# Supplementary material for: Physiological factors influencing female fertility in birds
Source: PubMed Central journal article supplement (PMC8316823; doi:10.1098/rsos.202274), 2021-07-28
Supplement: rsos202274_review_history.pdf [file rsos202274_review_history.pdf]

## Physiological factors influencing female fertility in birds

Katherine Assersohn, Patricia Brekke and Nicola Hemmings

### Article citation details

*R. Soc. open sci.* **8**: 202274.

<http://dx.doi.org/10.1098/rsos.202274>

### Review timeline

Original submission: 15 December 2020

1st revised submission: 17 May 2021

2nd revised submission: 8 July 2021

Final acceptance: 12 July 2021

Note: Reports are unedited and appear as submitted by the referee. The review history appears in chronological order.

## Review History

### RSOS-202274.R0 (Original submission)

#### Review form: Reviewer 1

**Is the manuscript scientifically sound in its present form?**

Yes

**Are the interpretations and conclusions justified by the results?**

Yes

**Is the language acceptable?**

Yes

**Do you have any ethical concerns with this paper?**

No

**Have you any concerns about statistical analyses in this paper?**

No

**Recommendation?**

Accept with minor revision (please list in comments)

**Comments to the Author(s)**

I would not consider this to be a comprehensive review. But based on the objectives listed at the beginning of the paper, I am not sure it is meant to be. There are several other papers on the topic in poultry in particular that are not included in this review.

In the sperm:egg interaction section of the review, I know of several papers that are not cited. There is at least one theory of thought that I did not think was included and that is the interaction of the yolk with the IPVL in the non-germinal disc areas of the egg. I provided the authors some of those references but it has been a while since I have reviewed the literature on that topic and I would not consider this to be a comprehensive list.

The rest of my comments and suggestions are in the attached file (see Appendix A).

**Review form: Reviewer 2****Is the manuscript scientifically sound in its present form?**

Yes

**Are the interpretations and conclusions justified by the results?**

Yes

**Is the language acceptable?**

Yes

**Do you have any ethical concerns with this paper?**

No

**Have you any concerns about statistical analyses in this paper?**

No

**Recommendation?**

Major revision is needed (please make suggestions in comments)

**Comments to the Author(s)**

I have not followed the avian ovarian physiology literature in several years, but I am knowledgeable in the area of reproductive ecology and behavior. So, I feel I should be able to provide some insight from that perspective. My overall impression of this manuscript is very favorable. It is an important topic, and the authors are correct that fertility problems have been poorly defined historically and that female fertility is a vastly understudied area. The authors seem to cover the topic thoroughly, so it is my opinion that this manuscript would make an important and much-needed contribution to the field. With all that said, however, I am not convinced that Royal Society Open Science is the best venue for its publication, given the journal's own account of favoring papers that are of very broad, general interest. Indeed, I am not sure how broad and general the interest in physiological mechanisms of female bird fertility is. If the paper were on mechanisms of vertebrate or perhaps mammalian fertility, it might be of broader interest. But its current focus on female birds would seem to lend itself better to a bird journal, perhaps, or a journal more specifically oriented toward reproductive physiology, such as *Biology of Reproduction*.

As I indicated, however, I do feel that it is a worthwhile contribution, but some changes, as follows, would make it better. First, it is difficult to understand its overall organization. I wonder if a table of contents would be appropriate. I found it difficult to understand how each section tied in with the one before it and the one after it and then how they all fit together to address the central question: what causes infertility in female birds? One possibility would be to organize the paper around the anatomy of figure 2, walking the reader through each part of egg formation and how fertility can be affected in that part. Additionally, somewhere around line 41, it would be extremely helpful to list as many mechanisms for failed syngamy as possible in order to set up the rest of the paper. The paper could then be better organized around these. Currently, it seems vaguely organized around aspects of Figure 2, but a more deliberate breakdown of the specific ways syngamy can fail, perhaps in order of timing, would greatly facilitate the organization of the paper and therefore understanding it. Currently the paper reads like a long list of what we know about reproduction with little direct tie-in to failed syngamy, especially in any sort of chronological or other logical order.

I think about fertility from an adaptive perspective. Given the presence of a multitude of life-history trade-offs (particularly the trade-offs between number of offspring and quality of offspring within a single brood and also the trade-off between number of current offspring and number of future offspring), perhaps the term "failure" is inappropriate when describing when fertilization does not occur. There may be times when it benefits the female from a fitness perspective to avoid fertilization, even if it means the wasted time and energy that went into production of an infertile ovum or egg. Given that, at least in wild, altricial birds, far more investment occurs in feeding young than in forming the egg for the young, a female suddenly faced with an unexpected challenge (such as unexpected energy demands, predatory risks, or poor quality mate) might benefit by selectively blocking fertilization to avoid costly stages later during nestling rearing when conditions might not merit the investment. For example, the female may be constrained to laying 4 eggs, but challenging food conditions might mean that, this particular bout, 3 eggs might be more adaptive, so she can at least raise 3 good offspring rather than 4 poor ones. In this case, one way to save energy would be to adaptively prevent fertilization of one of the ova, giving rise to 4 eggs but only 3 mouths to feed. Ultimately, I think use of the terms "fail" and "succeed" when it comes to syngamy or fertilization is loaded and assumes fertilization is always adaptive, when there might be situations in which it is not adaptive.

Lines 408-410: Up to this point, the manuscript has mainly focused on what we know in domestic species, each time referring to how little is known in wild species. The reader is left wondering what IS known for wild species. So far, the manuscript mostly reads as a review in domestic species despite what seemed to be a focus early on on the importance of this topic to wild species.

Lines 686-687: It is this possibility specifically that I think of above all else when it comes to possible ways for fertilization to fail, and yet apparently nothing is known. Nonetheless, if the authors could go into greater detail, even if just speculation, I think it would resolve a lot of wondering by their readers.

In several places throughout the manuscript, the authors mention effects of aging on female fertility and mechanisms surrounding it. Although aging is relevant to an extent, it is unlikely to be particularly relevant in wild birds that never get very old. In fact, most wild birds may experience age-related increases in reproductive function during their short lives, and this may be due, in part, to priming by photostimulation (Sockman, K.W., Williams, T.D., Dawson, A., & Ball, G.F. (2004). Prior experience with photostimulation enhances photo-induced reproductive development in female European starlings: a possible basis for the age-related increase in avian reproductive performance. *Biology of Reproduction* 71, 979-986.)

Other comments:

Lines 28-29: Delete.

Line 40: Is this the most broadly used and accepted definition of infertility? If not, reword to say something like "We define infertility as . . ."

Line 87: It may be more technically difficult to study and understand female compared to male fertility.

Lines 133-136: Out of curiosity, how is the left but not right protected?

The paper's figures are beautifully made. Textbook quality.

Lines 192-193: Although not directly tied to the topic of fertility, it might be worth mentioning the role this is thought to play in yolk steroid deposition (Schwabl, H. (1993). Yolk is a source of maternal testosterone for developing birds. *Proceedings of the National Academy of Sciences USA* 90, 11446-11450; Groothuis, T.G.G., Müller, W., Von Engelhardt, N., Carere, C., & Eising, C. (2005). Maternal hormones as a tool to adjust offspring phenotype in avian species. *Neuroscience and Biobehavioral Reviews* 29, 329-352).

Line 220: But see: Arlt, D., Bensch, S., Hansson, B., Hasselquist, D., & Westerdahl, H. (2004). Observation of a ZZW female in a natural population: implications for avian sex determination. *Proceedings of the Royal Society of London B Biological Sciences* 271, S249-S251. doi:10.1098/rsbl.2003.0155

Lines 457-458: Increased relative to what? To a time more distant from ovulation?

## Decision letter (RSOS-202274.R0)

We hope you are keeping well at this difficult and unusual time. We continue to value your support of the journal in these challenging circumstances. If Royal Society Open Science can assist you at all, please don't hesitate to let us know at the email address below.

Dear Miss Assersohn

The Editors assigned to your paper RSOS-202274 "Physiological factors influencing female fertility in birds" have now received comments from reviewers and would like you to revise the paper in accordance with the reviewer comments and any comments from the Editors. Please note this decision does not guarantee eventual acceptance.

We invite you to respond to the comments supplied below and revise your manuscript. Below the referees' and Editors' comments (where applicable) we provide additional requirements. Final acceptance of your manuscript is dependent on these requirements being met. We provide guidance below to help you prepare your revision.

We do not generally allow multiple rounds of revision so we urge you to make every effort to fully address all of the comments at this stage. If deemed necessary by the Editors, your manuscript will be sent back to one or more of the original reviewers for assessment. If the original reviewers are not available, we may invite new reviewers.

Please submit your revised manuscript and required files (see below) no later than 21 days from today's (ie 19-Apr-2021) date. Note: the ScholarOne system will 'lock' if submission of the revision is attempted 21 or more days after the deadline. If you do not think you will be able to meet this deadline please contact the editorial office immediately.

Please note article processing charges apply to papers accepted for publication in Royal Society Open Science (<https://royalsocietypublishing.org/rsos/charges>). Charges will also apply to papers transferred to the journal from other Royal Society Publishing journals, as well as papers submitted as part of our collaboration with the Royal Society of Chemistry (<https://royalsocietypublishing.org/rsos/chemistry>). Fee waivers are available but must be requested when you submit your revision (<https://royalsocietypublishing.org/rsos/waivers>).

Thank you for submitting your manuscript to Royal Society Open Science and we look forward to receiving your revision. If you have any questions at all, please do not hesitate to get in touch.

Best regards,  
Lianne Parkhouse  
Editorial Coordinator  
Royal Society Open Science  
[openscience@royalsociety.org](mailto:openscience@royalsociety.org)

on behalf of Professor Kevin Padian (Subject Editor)  
[openscience@royalsociety.org](mailto:openscience@royalsociety.org)

Editor Comments to Author:

Thank you for your submission. As you will see the reviewers are generally favorable but have some rather different concerns. We ask you to address these carefully in your revision. Best wishes.

Reviewer comments to Author:

Reviewer: 1

Comments to the Author(s)

I would not consider this to be a comprehensive review. But based on the objectives listed at the beginning of the paper, I am not sure it is meant to be. There are several other papers on the topic in poultry in particular that are not included in this review.

In the sperm:egg interaction section of the review, I know of several papers that are not cited.

There is at least one theory of thought that I did not think was included and that is the interaction of the yolk with the IPVL in the non-germinal disc areas of the egg. I provided the authors some of those references but it has been a while since I have reviewed the literature on that topic and I would not consider this to be a comprehensive list.

The rest of my comments and suggestions are in the attached file.

Reviewer: 2

Comments to the Author(s)

I have not followed the avian ovarian physiology literature in several years, but I am knowledgeable in the area of reproductive ecology and behavior. So, I feel I should be able to provide some insight from that perspective. My overall impression of this manuscript is very favorable. It is an important topic, and the authors are correct that fertility problems have been poorly defined historically and that female fertility is a vastly understudied area. The authors seem to cover the topic thoroughly, so it is my opinion that this manuscript would make an

important and much-needed contribution to the field. With all that said, however, I am not convinced that Royal Society Open Science is the best venue for its publication, given the journal's own account of favoring papers that are of very broad, general interest. Indeed, I am not sure how broad and general the interest in physiological mechanisms of female bird fertility is. If the paper were on mechanisms of vertebrate or perhaps mammalian fertility, it might be of broader interest. But its current focus on female birds would seem to lend itself better to a bird journal, perhaps, or a journal more specifically oriented toward reproductive physiology, such as *Biology of Reproduction*.

As I indicated, however, I do feel that it is a worthwhile contribution, but some changes, as follows, would make it better. First, it is difficult to understand its overall organization. I wonder if a table of contents would be appropriate. I found it difficult to understand how each section tied in with the one before it and the one after it and then how they all fit together to address the central question: what causes infertility in female birds? One possibility would be to organize the paper around the anatomy of figure 2, walking the reader through each part of egg formation and how fertility can be affected in that part. Additionally, somewhere around line 41, it would be extremely helpful to list as many mechanisms for failed syngamy as possible in order to set up the rest of the paper. The paper could then be better organized around these. Currently, it seems vaguely organized around aspects of Figure 2, but a more deliberate breakdown of the specific ways syngamy can fail, perhaps in order of timing, would greatly facilitate the organization of the paper and therefore understanding it. Currently the paper reads like a long list of what we know about reproduction with little direct tie-in to failed syngamy, especially in any sort of chronological or other logical order.

I think about fertility from an adaptive perspective. Given the presence of a multitude of life-history trade-offs (particularly the trade-offs between number of offspring and quality of offspring within a single brood and also the trade-off between number of current offspring and number of future offspring), perhaps the term "failure" is inappropriate when describing when fertilization does not occur. There may be times when it benefits the female from a fitness perspective to avoid fertilization, even if it means the wasted time and energy that went into production of an infertile ovum or egg. Given that, at least in wild, altricial birds, far more investment occurs in feeding young than in forming the egg for the young, a female suddenly faced with an unexpected challenge (such as unexpected energy demands, predatory risks, or poor quality mate) might benefit by selectively blocking fertilization to avoid costly stages later during nestling rearing when conditions might not merit the investment. For example, the female may be constrained to laying 4 eggs, but challenging food conditions might mean that, this particular bout, 3 eggs might be more adaptive, so she can at least raise 3 good offspring rather than 4 poor ones. In this case, one way to save energy would be to adaptively prevent fertilization of one of the ova, giving rise to 4 eggs but only 3 mouths to feed. Ultimately, I think use of the terms "fail" and "succeed" when it comes to syngamy or fertilization is loaded and assumes fertilization is always adaptive, when there might be situations in which it is not adaptive.

Lines 408-410: Up to this point, the manuscript has mainly focused on what we know in domestic species, each time referring to how little is known in wild species. The reader is left wondering what IS known for wild species. So far, the manuscript mostly reads as a review in domestic species despite what seemed to be a focus early on on the importance of this topic to wild species.

Lines 686-687: It is this possibility specifically that I think of above all else when it comes to possible ways for fertilization to fail, and yet apparently nothing is known. Nonetheless, if the authors could go into greater detail, even if just speculation, I think it would resolve a lot of wondering by their readers.

In several places throughout the manuscript, the authors mention effects of aging on female fertility and mechanisms surrounding it. Although aging is relevant to an extent, it is unlikely to be particularly relevant in wild birds that never get very old. In fact, most wild birds may experience age-related increases in reproductive function during their short lives, and this may be due, in part, to priming by photostimulation (Sockman, K.W., Williams, T.D., Dawson, A., & Ball, G.F. (2004). Prior experience with photostimulation enhances photo-induced reproductive development in female European starlings: a possible basis for the age-related increase in avian reproductive performance. *Biology of Reproduction* 71, 979-986.)

Other comments:

Lines 28-29: Delete.

Line 40: Is this the most broadly used and accepted definition of infertility? If not, reword to say something like "We define infertility as . . ."

Line 87: It may be more technically difficult to study and understand female compared to male fertility.

Lines 133-136: Out of curiosity, how is the left but not right protected?

The paper's figures are beautifully made. Textbook quality.

Lines 192-193: Although not directly tied to the topic of fertility, it might be worth mentioning the role this is thought to play in yolk steroid deposition (Schwabl, H. (1993). Yolk is a source of maternal testosterone for developing birds. *Proceedings of the National Academy of Sciences USA* 90, 11446-11450; Groothuis, T.G.G., Müller, W., Von Engelhardt, N., Carere, C., & Eising, C. (2005). Maternal hormones as a tool to adjust offspring phenotype in avian species. *Neuroscience and Biobehavioral Reviews* 29, 329-352).

Line 220: But see: Arlt, D., Bensch, S., Hansson, B., Hasselquist, D., & Westerdahl, H. (2004). Observation of a ZZW female in a natural population: implications for avian sex determination. *Proceedings of the Royal Society of London B Biological Sciences* 271, S249-S251. doi:10.1098/rsbl.2003.0155

Lines 457-458: Increased relative to what? To a time more distant from ovulation?

===PREPARING YOUR MANUSCRIPT===

Your revised paper should include the changes requested by the referees and Editors of your manuscript. You should provide two versions of this manuscript and both versions must be provided in an editable format:

one version identifying all the changes that have been made (for instance, in coloured highlight, in bold text, or tracked changes);

a 'clean' version of the new manuscript that incorporates the changes made, but does not highlight them. This version will be used for typesetting if your manuscript is accepted.

Please ensure that any equations included in the paper are editable text and not embedded images.

Please ensure that you include an acknowledgements' section before your reference list/bibliography. This should acknowledge anyone who assisted with your work, but does not

qualify as an author per the guidelines at <https://royalsociety.org/journals/ethics-policies/openness/>.

While not essential, it will speed up the preparation of your manuscript proof if accepted if you format your references/bibliography in Vancouver style (please see <https://royalsociety.org/journals/authors/author-guidelines/#formatting>). You should include DOIs for as many of the references as possible.

If you have been asked to revise the written English in your submission as a condition of publication, you must do so, and you are expected to provide evidence that you have received language editing support. The journal would prefer that you use a professional language editing service and provide a certificate of editing, but a signed letter from a colleague who is a native speaker of English is acceptable. Note the journal has arranged a number of discounts for authors using professional language editing services (<https://royalsociety.org/journals/authors/benefits/language-editing/>).

#### ===PREPARING YOUR REVISION IN SCHOLARONE===

To revise your manuscript, log into <https://mc.manuscriptcentral.com/rsos> and enter your Author Centre - this may be accessed by clicking on "Author" in the dark toolbar at the top of the page (just below the journal name). You will find your manuscript listed under "Manuscripts with Decisions". Under "Actions", click on "Create a Revision".

Attach your point-by-point response to referees and Editors at Step 1 'View and respond to decision letter'. This document should be uploaded in an editable file type (.doc or .docx are preferred). This is essential.

Please ensure that you include a summary of your paper at Step 2 'Type, Title, & Abstract'. This should be no more than 100 words to explain to a non-scientific audience the key findings of your research. This will be included in a weekly highlights email circulated by the Royal Society press office to national UK, international, and scientific news outlets to promote your work.

At Step 3 'File upload' you should include the following files:

-- Your revised manuscript in editable file format (.doc, .docx, or .tex preferred). You should upload two versions:

- 1) One version identifying all the changes that have been made (for instance, in coloured highlight, in bold text, or tracked changes);
- 2) A 'clean' version of the new manuscript that incorporates the changes made, but does not highlight them.

-- An individual file of each figure (EPS or print-quality PDF preferred [either format should be produced directly from original creation package], or original software format).

-- An editable file of each table (.doc, .docx, .xls, .xlsx, or .csv).

-- An editable file of all figure and table captions.

Note: you may upload the figure, table, and caption files in a single Zip folder.

-- Any electronic supplementary material (ESM).

-- If you are requesting a discretionary waiver for the article processing charge, the waiver form must be included at this step.

-- If you are providing image files for potential cover images, please upload these at this step, and inform the editorial office you have done so. You must hold the copyright to any image provided.

-- A copy of your point-by-point response to referees and Editors. This will expedite the preparation of your proof.



At Step 6 'Details & comments', you should review and respond to the queries on the electronic submission form. In particular, we would ask that you do the following:

- Ensure that your data access statement meets the requirements at <https://royalsociety.org/journals/authors/author-guidelines/#data>. You should ensure that you cite the dataset in your reference list. If you have deposited data etc in the Dryad repository, please include both the 'For publication' link and 'For review' link at this stage.
- If you are requesting an article processing charge waiver, you must select the relevant waiver option (if requesting a discretionary waiver, the form should have been uploaded at Step 3 'File upload' above).
- If you have uploaded ESM files, please ensure you follow the guidance at <https://royalsociety.org/journals/authors/author-guidelines/#supplementary-material> to include a suitable title and informative caption. An example of appropriate titling and captioning may be found at [https://figshare.com/articles/Table\\_S2\\_from\\_Is\\_there\\_a\\_trade-off\\_between\\_peak\\_performance\\_and\\_performance\\_breadth\\_across\\_temperatures\\_for\\_aerobic\\_scooping\\_in\\_teleost\\_fishes\\_/3843624](https://figshare.com/articles/Table_S2_from_Is_there_a_trade-off_between_peak_performance_and_performance_breadth_across_temperatures_for_aerobic_scooping_in_teleost_fishes_/3843624).

At Step 7 'Review & submit', you must view the PDF proof of the manuscript before you will be able to submit the revision. Note: if any parts of the electronic submission form have not been completed, these will be noted by red message boxes.

## Author's Response to Decision Letter for (RSOS-202274.R0)

See Appendix B.

## RSOS-202274.R1 (Revision)

### Review form: Reviewer 1

**Is the manuscript scientifically sound in its present form?**

Yes

**Are the interpretations and conclusions justified by the results?**

Yes

**Is the language acceptable?**

Yes

**Do you have any ethical concerns with this paper?**

No

**Have you any concerns about statistical analyses in this paper?**

No

**Recommendation?**

Accept with minor revision (please list in comments)

### Comments to the Author(s)

Personally I think your revisions have improved the paper greatly. I only have one minor suggestion before publishing. In every other case in the paper were the term "for example" was used, you provided an example. In one case you did not. See the Line 445 comment below.

Line 445 – This is a personal preference, but I do think it helps the readers if when the text says “although there are a few example...”, especially those new to the an area, make the information more useful to them, that some specific examples, maybe in parenthesis are provided.

## Decision letter (RSOS-202274.R1)

We hope you are keeping well at this difficult and unusual time. We continue to value your support of the journal in these challenging circumstances. If Royal Society Open Science can assist you at all, please don't hesitate to let us know at the email address below.

Dear Miss Assersohn,

On behalf of the Editors, we are pleased to inform you that your Manuscript RSOS-202274.R1 "Physiological factors influencing female fertility in birds" has been accepted for publication in Royal Society Open Science subject to minor revision in accordance with the referees' reports. Please find the referees' comments along with any feedback from the Editors below my signature.

We invite you to respond to the comments and revise your manuscript. Below the referees' and Editors' comments (where applicable) we provide additional requirements. Final acceptance of your manuscript is dependent on these requirements being met. We provide guidance below to help you prepare your revision.

Please submit your revised manuscript and required files (see below) no later than 7 days from today's (ie 05-Jul-2021) date. Note: the ScholarOne system will 'lock' if submission of the revision is attempted 7 or more days after the deadline. If you do not think you will be able to meet this deadline please contact the editorial office immediately.

Please note article processing charges apply to papers accepted for publication in Royal Society Open Science (<https://royalsocietypublishing.org/rsos/charges>). Charges will also apply to papers transferred to the journal from other Royal Society Publishing journals, as well as papers submitted as part of our collaboration with the Royal Society of Chemistry (<https://royalsocietypublishing.org/rsos/chemistry>). Fee waivers are available but must be requested when you submit your revision (<https://royalsocietypublishing.org/rsos/waivers>).

Thank you for submitting your manuscript to Royal Society Open Science and we look forward to receiving your revision. If you have any questions at all, please do not hesitate to get in touch.

Kind regards,  
Royal Society Open Science Editorial Office  
Royal Society Open Science  
[openscience@royalsociety.org](mailto:openscience@royalsociety.org)

on behalf of Professor Kevin Padian (Subject Editor)  
[openscience@royalsociety.org](mailto:openscience@royalsociety.org)

#### Associate Editor Comments to Author:

Thank you for your patience while we sought re-review. Unfortunately, only one of the original reviewers was available to assess your changes, and though a new reviewer had agreed to report, we regret that they were not able to do so in the end. With this in mind, we've opted to make a decision based on the feedback of the reviewer who did agree and report. Thank you for this contribution and we'll look forward to receiving the final version shortly.

#### Reviewer comments to Author:

Reviewer: 1

#### Comments to the Author(s)

Personally I think your revisions have improved the paper greatly. I only have one minor suggestion before publishing. In every other case in the paper where the term "for example" was used, you provided an example. In one case you did not. See the Line 445 comment below.

Line 445 - This is a personal preference, but I do think it helps the readers if when the text says "although there are a few examples...", especially those new to the area, make the information more useful to them, that some specific examples, maybe in parenthesis are provided.

#### ===PREPARING YOUR MANUSCRIPT===

Your revised paper should include the changes requested by the referees and Editors of your manuscript. You should provide two versions of this manuscript and both versions must be provided in an editable format:

one version identifying all the changes that have been made (for instance, in coloured highlight, in bold text, or tracked changes);

a 'clean' version of the new manuscript that incorporates the changes made, but does not highlight them. This version will be used for typesetting.

Please ensure that any equations included in the paper are editable text and not embedded images.

Please ensure that you include an acknowledgements' section before your reference list/bibliography. This should acknowledge anyone who assisted with your work, but does not qualify as an author per the guidelines at <https://royalsociety.org/journals/ethics-policies/openness/>.

While not essential, it will speed up the preparation of your manuscript proof if you format your references/bibliography in Vancouver style (please see <https://royalsociety.org/journals/authors/author-guidelines/#formatting>). You should include DOIs for as many of the references as possible.

If you have been asked to revise the written English in your submission as a condition of publication, you must do so, and you are expected to provide evidence that you have received language editing support. The journal would prefer that you use a professional language editing service and provide a certificate of editing, but a signed letter from a colleague who is a native speaker of English is acceptable. Note the journal has arranged a number of discounts for authors using professional language editing services (<https://royalsociety.org/journals/authors/benefits/language-editing/>).

#### ===PREPARING YOUR REVISION IN SCHOLARONE===

To revise your manuscript, log into <https://mc.manuscriptcentral.com/rsos> and enter your Author Centre - this may be accessed by clicking on "Author" in the dark toolbar at the top of the page (just below the journal name). You will find your manuscript listed under "Manuscripts with Decisions". Under "Actions", click on "Create a Revision".

Attach your point-by-point response to referees and Editors at Step 1 'View and respond to decision letter'. This document should be uploaded in an editable file type (.doc or .docx are preferred). This is essential.

Please ensure that you include a summary of your paper at Step 2 'Type, Title, & Abstract'. This should be no more than 100 words to explain to a non-scientific audience the key findings of your research. This will be included in a weekly highlights email circulated by the Royal Society press office to national UK, international, and scientific news outlets to promote your work.

At Step 3 'File upload' you should include the following files:

-- Your revised manuscript in editable file format (.doc, .docx, or .tex preferred). You should upload two versions:

- 1) One version identifying all the changes that have been made (for instance, in coloured highlight, in bold text, or tracked changes);
- 2) A 'clean' version of the new manuscript that incorporates the changes made, but does not highlight them.

-- An individual file of each figure (EPS or print-quality PDF preferred [either format should be produced directly from original creation package], or original software format).

-- An editable file of each table (.doc, .docx, .xls, .xlsx, or .csv).

-- An editable file of all figure and table captions.

Note: you may upload the figure, table, and caption files in a single Zip folder.

-- Any electronic supplementary material (ESM).

-- If you are requesting a discretionary waiver for the article processing charge, the waiver form must be included at this step.

-- If you are providing image files for potential cover images, please upload these at this step, and inform the editorial office you have done so. You must hold the copyright to any image provided.

-- A copy of your point-by-point response to referees and Editors. This will expedite the preparation of your proof.

At Step 6 'Details & comments', you should review and respond to the queries on the electronic submission form. In particular, we would ask that you do the following:

-- Ensure that your data access statement meets the requirements at

<https://royalsociety.org/journals/authors/author-guidelines/#data>. You should ensure that you cite the dataset in your reference list. If you have deposited data etc in the Dryad repository, please only include the 'For publication' link at this stage. You should remove the 'For review' link.

-- If you are requesting an article processing charge waiver, you must select the relevant waiver option (if requesting a discretionary waiver, the form should have been uploaded at Step 3 'File upload' above).

-- If you have uploaded ESM files, please ensure you follow the guidance at

<https://royalsociety.org/journals/authors/author-guidelines/#supplementary-material> to include a suitable title and informative caption. An example of appropriate titling and captioning may be found at [https://figshare.com/articles/Table\\_S2\\_from\\_Is\\_there\\_a\\_trade-off\\_between\\_peak\\_performance\\_and\\_performance\\_breadth\\_across\\_temperatures\\_for\\_aerobic\\_scope\\_in\\_teleost\\_fishes\\_/3843624](https://figshare.com/articles/Table_S2_from_Is_there_a_trade-off_between_peak_performance_and_performance_breadth_across_temperatures_for_aerobic_scope_in_teleost_fishes_/3843624).

At Step 7 'Review & submit', you must view the PDF proof of the manuscript before you will be able to submit the revision. Note: if any parts of the electronic submission form have not been completed, these will be noted by red message boxes.

## Author's Response to Decision Letter for (RSOS-202274.R1)

See Appendix C.

## Decision letter (RSOS-202274.R2)

We hope you are keeping well at this difficult and unusual time. We continue to value your support of the journal in these challenging circumstances. If Royal Society Open Science can assist you at all, please don't hesitate to let us know at the email address below.

Dear Dr Assersohn,

I am pleased to inform you that your manuscript entitled "Physiological factors influencing female fertility in birds" is now accepted for publication in Royal Society Open Science.

Please ensure that you send to the editorial office an editable version of your accepted manuscript, and individual files for each figure and table included in your manuscript. You can send these in a zip folder if more convenient. Failure to provide these files may delay the processing of your proof. You may disregard this request if you have already provided these files to the editorial office.

If you have not already done so, please remember to make any data sets or code libraries 'live' prior to publication, and update any links as needed when you receive a proof to check - for instance, from a private 'for review' URL to a publicly accessible 'for publication' URL. It is good practice to also add data sets, code and other digital materials to your reference list.

You can expect to receive a proof of your article in the near future. Please contact the editorial office ([openscience@royalsociety.org](mailto:openscience@royalsociety.org)) and the production office ([openscience\\_proofs@royalsociety.org](mailto:openscience_proofs@royalsociety.org)) to let us know if you are likely to be away from e-mail contact -- if you are going to be away, please nominate a co-author (if available) to manage the proofing process, and ensure they are copied into your email to the journal. Due to rapid publication and an extremely tight schedule, if comments are not received, your paper may experience a delay in publication.

Please see the Royal Society Publishing guidance on how you may share your accepted author manuscript at <https://royalsociety.org/journals/ethics-policies/media-embargo/>. After publication, some additional ways to effectively promote your article can also be found here <https://royalsociety.org/blog/2020/07/promoting-your-latest-paper-and-tracking-your-results/>.

On behalf of the Editors of Royal Society Open Science, thank you for your support of the journal and we look forward to your continued contributions to Royal Society Open Science.

Kind regards,  
Royal Society Open Science Editorial Office  
Royal Society Open Science  
[openscience@royalsociety.org](mailto:openscience@royalsociety.org)

on behalf of Prof Kevin Padian (Subject Editor)  
[openscience@royalsociety.org](mailto:openscience@royalsociety.org)

Follow Royal Society Publishing on Twitter: @RSocPublishing  
Follow Royal Society Publishing on Facebook:  
<https://www.facebook.com/RoyalSocietyPublishing.FanPage/>  
Read Royal Society Publishing's blog:  
<https://royalsociety.org/blog/blogsearchpage/?category=Publishing>

**Appendix A****ROYAL SOCIETY  
OPEN SCIENCE****Physiological factors influencing female fertility in birds**

|                               |                                                                                                                                                                                                                                      |
|-------------------------------|--------------------------------------------------------------------------------------------------------------------------------------------------------------------------------------------------------------------------------------|
| Journal:                      | <i>Royal Society Open Science</i>                                                                                                                                                                                                    |
| Manuscript ID                 | RSOS-202274                                                                                                                                                                                                                          |
| Article Type:                 | Review                                                                                                                                                                                                                               |
| Date Submitted by the Author: | 15-Dec-2020                                                                                                                                                                                                                          |
| Complete List of Authors:     | Assersohn, Katherine; The University of Sheffield, Animal and Plant Sciences<br>Brekke, Patricia; Institute of Zoology of the Zoological Society of London<br>Hemmings, Nicola; The University of Sheffield, Animal & Plant Sciences |
| Subject:                      | physiology < BIOLOGY, evolution < BIOLOGY, health and disease and epidemiology < BIOLOGY                                                                                                                                             |
| Keywords:                     | Hatching failure, Female fertility, Reproduction, Egg production, Sperm storage, Fertilisation                                                                                                                                       |
| Subject Category:             | Organismal and Evolutionary Biology                                                                                                                                                                                                  |
|                               |                                                                                                                                                                                                                                      |

SCHOLARONE™  
Manuscripts

**Author-supplied statements**

Relevant information will appear here if provided.

***Ethics***

*Does your article include research that required ethical approval or permits?:*

This article does not present research with ethical considerations

*Statement (if applicable):*

CUST\_IF\_YES\_ETHICS :No data available.

***Data***

*It is a condition of publication that data, code and materials supporting your paper are made publicly available. Does your paper present new data?:*

Yes

*Statement (if applicable):*

The dataset supporting this article has been uploaded as part of the supplementary material.

***Conflict of interest***

I/We declare we have no competing interests

*Statement (if applicable):*

CUST\_STATE\_CONFLICT :No data available.

***Authors' contributions***

This paper has multiple authors and our individual contributions were as below

*Statement (if applicable):*

K.A carried out the data collection, data analysis, created the figures and drafted the manuscript; P.B critically revised the manuscript; N.H participated in data collection, assisted in data analysis and critically revised the manuscript. All authors gave final approval for publication and agree to be held accountable for the work performed therein.



# 1 **Physiological factors influencing female fertility in** 2 **birds**

3 **Katherine Assersohn<sup>1\*</sup>, Patricia Brekke<sup>2</sup>, Nicola Hemmings<sup>1</sup>**

4 *<sup>1</sup>Department of Animal and Plant Sciences, University of Sheffield, Sheffield, S10 2TN*

5 *<sup>2</sup>Institute of Zoology, Zoological Society of London, Regents Park, London, NW1 4RY*

## 6 **Abstract**

7 Fertility is fundamental to reproductive success, but not all copulation attempts result in a  
8 fertilised embryo. Fertilisation failure is especially costly for females, and while there is a  
9 growing appreciation for the considerable influence that female processes can have over  
10 fertilisation, we lack a clear understanding of the causes of variation in female fertility across  
11 taxa. Birds make a useful model system for fertility research, partly because their large eggs  
12 are easily studied outside of the female's body, but also because of the wealth of data available  
13 on the reproductive productivity of commercial birds. Here, we review the factors that  
14 contribute to female infertility in birds, providing evidence that female fertility traits are being  
15 understudied relative to male fertility traits, and that there is a bias in research effort towards  
16 the study of Galliformes and captive (relative to wild) populations. We then highlight and  
17 discuss the key physiological stages of the female reproductive cycle where fertility may be  
18 compromised, and make recommendations for future research. We particularly emphasise the  
19 need for studies to clearly differentiate between infertility and embryo mortality as causes of  
20 hatching failure, and for information about non-breeding individuals to be more routinely  
21 collected where possible. This review lays the groundwork for developing a clearer

1  
2  
3 22 understanding of the causes of female infertility, with important consequences for multiple  
4  
5 23 fields including reproductive science, conservation and commercial breeding.  
6  
7  
8 24

9  
10 25 *Key words:* hatching failure, female fertility, reproduction, egg production, sperm storage,  
11  
12 26 fertilisation  
13  
14

## 15 16 27 **I. Introduction** 17 18

19  
20 28 In order to contribute genes to future generations and obtain evolutionary fitness, an individual  
21  
22 29 must successfully reproduce. Fertility is fundamental to reproductive success, so we should  
23  
24 30 expect fertility traits to be under strong selection to maximise reproductive output and minimise  
25  
26 31 the wastage of gamete investment [1,2]. Despite this, fertility varies remarkably across  
27  
28 32 individuals, species and populations [3,4], and some degree of infertility is ubiquitous across  
29  
30 33 taxa. Gametic wastage is likely to be more costly for females than males [4], since they  
31  
32 34 typically invest considerably more in gamete production [5]. These costs are also likely to be  
33  
34 35 greater in taxa that produce large yolky ova, such as birds, but despite this, females are thought  
35  
36 36 to have received comparatively less attention than males within avian fertility research  
37  
38 37 (particularly in poultry science) [6].  
39  
40  
41  
42  
43  
44

45 39 Successful fertilisation occurs when a male pronucleus and a female pronucleus fuse to form a  
46  
47 40 zygote (i.e. syngamy) [7]. Infertility can therefore be defined as the failure of syngamy, and  
48  
49 41 any male or female process contributing to failed syngamy is a cause of infertility. Confusingly,  
50  
51 42 the term infertility has been used interchangeably in the literature to describe both fertilisation  
52  
53 43 failure and embryo mortality across taxa, though these two processes often have a very  
54  
55 44 different mechanistic basis [8]. Differentiating between infertility and embryo mortality is  
56  
57 45 often difficult, particularly if the embryo dies during the very early stages of development [9],  
58  
59  
60

1  
2  
3 46 but the failure to distinguish between them presents an important barrier to addressing the  
4  
5 47 underlying causes of reproductive failure.  
6  
7  
8 48

9  
10 49 Birds are well suited to the study of reproductive failure, primarily because – unlike mammals  
11  
12 50 – they produce large, well-protected eggs which make them easy to examine externally before  
13  
14 51 they degrade [9]. It is also possible to precisely determine whether a bird’s egg failed because  
15  
16 52 it was unfertilised or because the embryo died very early, using microscopic methods, but many  
17  
18 53 studies still fail to make the distinction [8,10]. Avian reproduction science also benefits from a  
19  
20 54 wealth of knowledge from commercial poultry research. Despite intensive, long-term selection  
21  
22 55 for consistent and efficient egg production in commercially important species such as the  
23  
24 56 domestic fowl (*Gallus gallus domesticus*) and turkey (*Meleagris gallopavo*), hatching failure  
25  
26 57 is still a pervasive issue in commercial breeds, and the reasons for this are not fully understood  
27  
28 58 [9,11]. In the wild, hatching failure is also ubiquitous; on average 10% of eggs never hatch [2],  
29  
30 59 and in some threatened and bottlenecked species more than 60-70% of eggs fail [12,13]. While  
31  
32 60 there has been some attention paid to embryo mortality in birds, we still lack a clear  
33  
34 61 understanding of the incidence of true infertility and the factors that contribute towards it [14].  
35  
36 62 The incidence of infertility relative to embryo mortality in wild populations has most likely  
37  
38 63 been overestimated by many studies [9], while in captive birds, infertility may be more likely  
39  
40 64 [8]. Understanding the mechanisms that cause infertility could therefore be particularly  
41  
42 65 important for captive breeding programmes.  
43  
44  
45  
46  
47  
48  
49  
50

51 66  
52 67 Here, we provide a thorough review of female-specific factors that lead to infertility in birds,  
53  
54 68 revealing that female fertility traits are consistently understudied relative to males. We identify  
55  
56 69 and explore key phases in the female reproductive cycle where fertility may be compromised,  
57  
58 70 including egg production, oviductal sperm storage and transport, and syngamy (the fusion of  
59  
60

1  
2  
3 71 sperm and ovum), drawing particular attention to the relationships between senescence,  
4  
5 72 environmental factors, and female reproductive function. Our aim is to develop a clearer  
6  
7 73 understanding of the proximate causes of variation in female fertility and highlight key  
8  
9 74 directions for future research.  
10  
11  
12

## 13 75 **II. How much do we know about female fertility traits in birds?**

14  
15  
16  
17 76 We conducted a systematic search of the avian fertility literature (see supporting information  
18  
19 77 for methods), identifying 718 relevant papers on avian fertility traits, of which 42% considered  
20  
21 78 both male and female fertility, 37% focused on male fertility only, and 20% focused on female  
22  
23 79 fertility only. As expected, the number of avian fertility papers published each year is  
24  
25 80 increasing, but since 1985, the number of published papers that focus on male fertility have  
26  
27 81 increased at a faster rate than the number of papers focused on female fertility (Fig 1A) ( $\chi^2 =$   
28  
29 82 15,  $df = 2$ ,  $p < 0.001$ ). By April 2020, published papers focusing on male avian fertility  
30  
31 83 outnumbered those on female avian fertility by a factor of 1.84, indicating a strong bias in  
32  
33 84 research effort against the study of female fertility, a gap that appears to be widening over time.  
34  
35  
36  
37 85 However, studies that considered fertility traits in both males and females were almost as  
38  
39 86 numerous as those that considered males only, perhaps indicating that many researchers are  
40  
41 87 taking a more holistic approach. This may also reflect the inherent difficulties involved in  
42  
43 88 disentangling the effects of male and female factors on fertilisation success, since they are  
44  
45 89 likely to be non-independent processes exhibiting complex interactions [15]. Across all years  
46  
47 90 (from 1921 to 2020), 79% of articles exclusively investigated captive populations, with only  
48  
49 91 16% investigating wild populations and 5% investigating both captive and wild populations.  
50  
51 92 This suggests there has been a substantial bias in research effort towards the study of fertility  
52  
53 93 in captive populations rather than wild populations. Furthermore, of the captive species studied,  
54  
55 94 88% focussed exclusively on the order Galliformes, with 54% focussed exclusively on a single  
56  
57  
58  
59  
60

1  
2  
3 95 species: the domestic chicken (*Gallus gallus domesticus*). This indicates a further taxonomic  
4  
5 96 bias within the avian fertility literature toward gallinaceous birds of commercial importance.  
6  
7  
8 97 The bias in research effort towards male fertility appears consistent across both wild and  
9  
10 98 captive populations (Fig 1B).

11  
12 99

13  
14 100 The observed bias in research effort against female only papers may reflect that, relative to  
15  
16 101 ova, it is easy to collect sperm in a way that is non-invasive and repeatable. Sperm traits have  
17  
18 102 also been extensively studied in birds, and sperm biotechnology has been developed  
19  
20 103 considerably in poultry over the last century [16]. There may also be a degree of positive  
21  
22 104 feedback, with ease of collection and study of sperm yielding greater advances in methodology,  
23  
24 105 which in turn yields further research. The bias in research effort may also be a consequence of  
25  
26 106 the historical view that sperm are the ‘active’ participants in fertilisation: seeking, binding to  
27  
28 107 and penetrating the somewhat ‘passive’ egg [17]. Cultural biases have also been suggested to  
29  
30 108 drive a male-orientated research focus across other taxa including mammals [18]. While this  
31  
32  
33 109 view has been challenged in recent years (especially with regards to postcopulatory processes  
34  
35  
36 110 such as cryptic female choice [19]), the gap between the number of male and female fertility  
37  
38 111 papers suggests that female fertility traits in birds are still under-studied, and the role of the  
39  
40 112 female in determining reproductive success is therefore underappreciated. The following  
41  
42 113 sections explore the physiological mechanisms that may contribute to variation in female  
43  
44 114 fertility in birds, and suggest new hypotheses and future directions that may help fill the gaps  
45  
46  
47 115 in our current understanding of avian female fertility.  
48  
49  
50  
51  
52  
53  
54  
55  
56  
57  
58  
59  
60

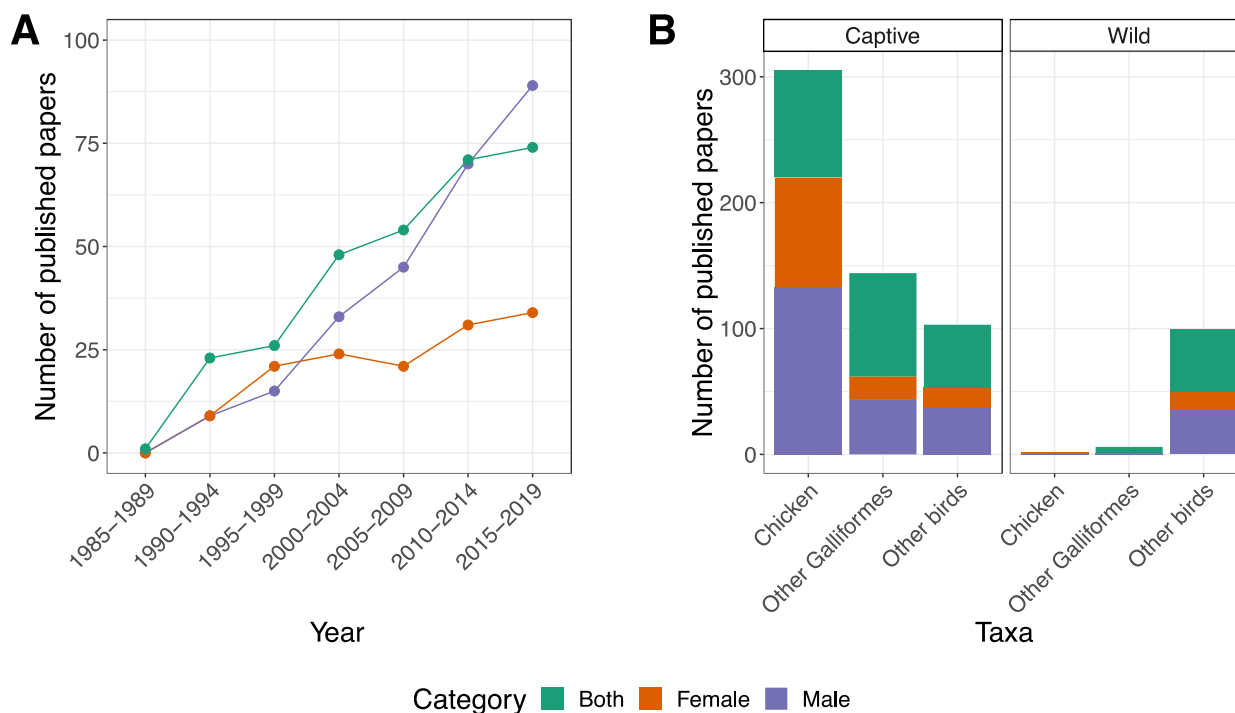

116

117 **Figure 1:** A) The number of papers published between 1985 and 2019 on avian fertility in  
 118 males only (purple), females only (orange) and both males and females (green). B) The number  
 119 of published papers on avian fertility published between 1921 and 2020 (all years) either  
 120 focusing exclusively on the domestic chicken (*Gallus gallus domesticus*), other Galliformes,  
 121 or other (non-Galliform) bird orders, for both captive (left) and wild (right) populations.

### 122 III. Physiological mechanisms of female infertility in birds

#### 123 (1) Producing eggs

124 In birds, infertility is typically measured as the number of unfertilised eggs, but this makes the  
 125 assumption that a female is already able to produce an ovum that can be fertilised. Female  
 126 fertility is the product of not only fertilisation rate, but also the number of eggs produced that  
 127 are capable of being fertilised. The process of egg formation – from follicular development  
 128 through to release of the ovum during ovulation - is a metabolically demanding process [20,21]

1  
2  
3 129 and problems occurring during these early stages of reproduction are a costly and important  
4  
5 130 cause of infertility.  
6  
7  
8

9 131 *a) The female reproductive system*  
10  
11

12 132 Reproductively active females of most bird species have one functional oviduct in which  
13  
14 133 there is usually just one ovary (Fig 2.). The right oviduct regresses early in development via  
15  
16 134 hormonally controlled apoptosis (caused by the release of anti-Müllerian hormone), while the  
17  
18 135 left oviduct is protected from regression by elevated concentrations of oestrogen (which  
19  
20 136 inhibits the anti-Müllerian hormone receptor) [22]. The mature avian ovary contains multiple  
21  
22 137 maturing follicles each at a different stage of development [23] (Fig 2.). Mature follicles  
23  
24 138 consist of a large, protein rich yolky oocyte and a small germinal disc (which contains the  
25  
26 139 genetic material), surrounded by a granulosa cell layer, multicellular theca layer and an  
27  
28 140 epithelial layer (Fig 3.) [24,25]. At the vegetal pole of the egg, the epithelial layer becomes  
29  
30 141 thin, forming a region known as the stigma that acts as the point of rupture during ovulation  
31  
32 142 [25]. During the later stages of follicular growth, a glycoprotein structure known as the  
33  
34 143 perivitelline layer forms between the granulosa cells and the oocyte (Fig 3.). The perivitelline  
35  
36 144 layer functions to bind with sperm during fertilisation and initiate the acrosome reaction [26].  
37  
38 145 In birds, the mechanisms underpinning follicular development, maintenance and selection  
39  
40 146 have yet to be well-defined, although the implications of these processes are likely to be  
41  
42 147 significant for fertility [27]. Follicular selection (i.e. the selection of one white follicle to  
43  
44 148 rapidly uptake yolk, undergo further differentiation and eventually ovulate as a mature yellow  
45  
46 149 follicle) is thought to be mediated by cAMP (cyclic adenosine monophosphate) signaling,  
47  
48 150 which acts through G protein coupled receptors to upregulate the expression of multiple  
49  
50 151 genetic factors important for follicular development [22,27–29]. The unselected white  
51  
52 152 follicles are maintained in an undifferentiated/arrested yet viable state within the ovary until  
53  
54  
55  
56  
57  
58  
59  
60

1  
2  
3 153 the next follicular selection [25]. This is thought to be regulated in part by the  $\beta$ -arrestin  
4  
5 154 protein, which desensitises G protein couple receptors (and thus inhibits cAMP signalling),  
6  
7 155 and depresses granulosa cell differentiation [27]. Understanding the mechanisms governing  
8  
9 156 follicular recruitment and maintenance is considered a primary challenge in avian  
10  
11 157 reproductive research [25,30].  
12  
13  
14

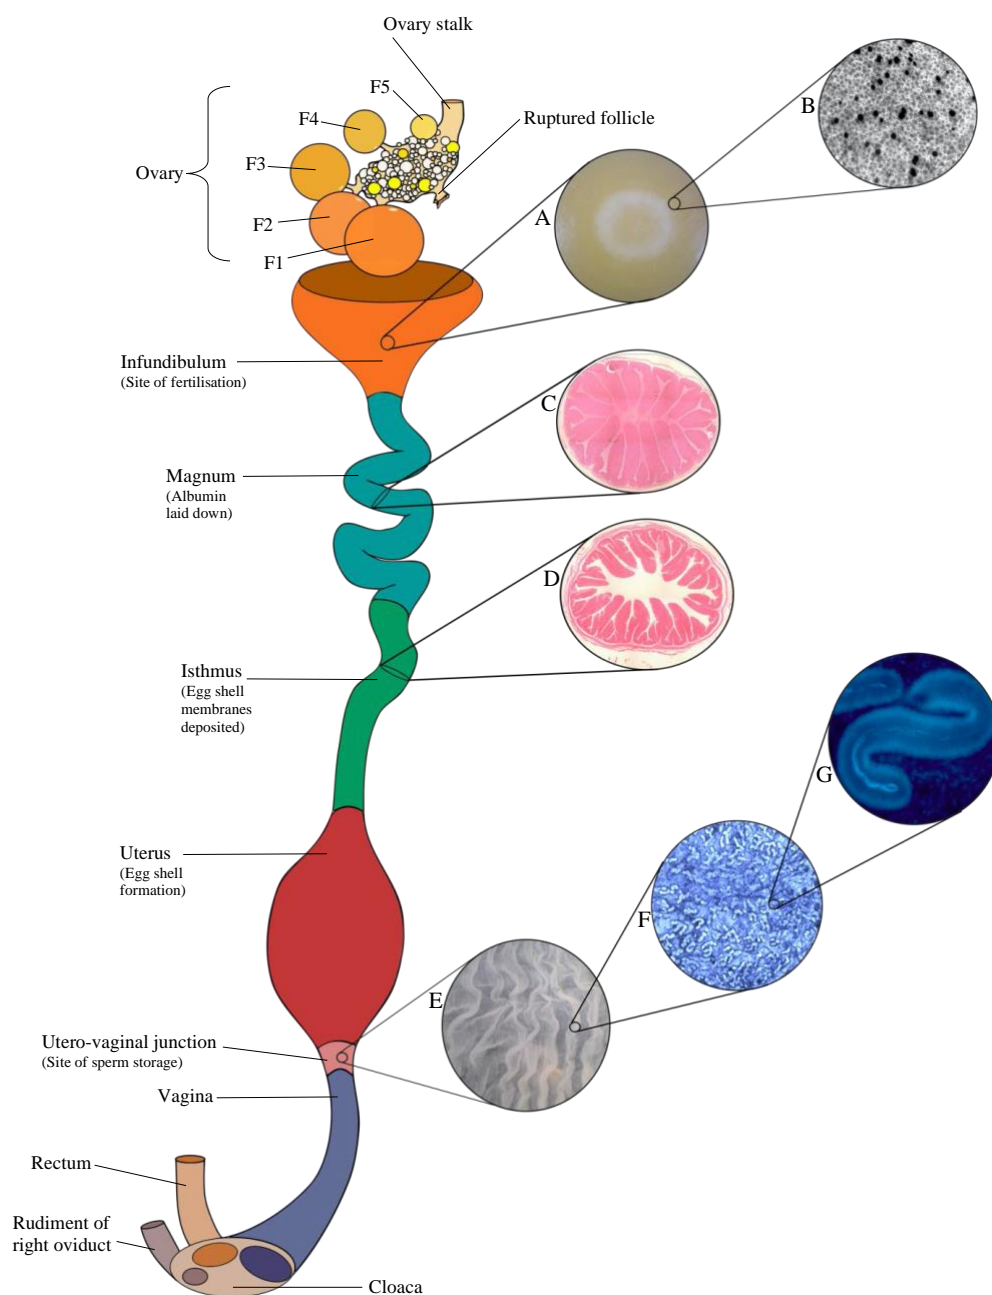

158 **Figure 2:** Schematic representation of the avian oviduct and ovary (not to scale). Note that  
159 the avian ovary consists of multiple follicles at different stages of development. The largest



1  
2  
3 160 yellow follicles are labelled F1-5 where F1 is the largest follicle and will be the next to  
4  
5 161 rupture. **A:** The germinal disc of a fertilised ovum (from a zebra finch (*Taeniopygia guttata*)).  
6  
7 162 Note the clear outer ring and paler center of the germinal disc which indicates embryonic  
8  
9 163 development. **B:** Sperm penetration holes visible on the inner perivitelline layer of an ovum  
10  
11 164 after fertilisation (from a bullfinch (*Pyrrhula pyrrhula*)). **C:** A cross section of the magnum  
12  
13 165 (from a helmeted guineafowl (*Numida meleagris*)). Sperm is transported through the  
14  
15 166 magnum prior to fertilisation, but this region functions mainly to produce the albumin which  
16  
17 167 is laid down during egg development; **D:** A cross section of the isthmus (from Reeves  
18  
19 168 pheasant (*Syrnaticus reevesii*)). Sperm is also transported through the isthmus prior to  
20  
21 169 fertilisation, but this region functions mainly to produce and deposit shell membranes during  
22  
23 170 egg development; **E:** The internal tissue lining and folds of the vagina and utero-vaginal  
24  
25 171 junction region (from a bobwhite quail (*Colinus virginianus*)). The vagina is considered the  
26  
27 172 primary site of sperm selection in the oviduct, and the utero-vaginal junction functions as the  
28  
29 173 primary site of sperm storage, containing numerous sperm storage tubules; **F:** A single fold of  
30  
31 174 the utero-vaginal junction (from a zebra finch (*Taeniopygia guttata*)) stained with Hoechst  
32  
33 175 33342 dye under a fluorescence microscope. The many small tubular structures are sperm  
34  
35 176 storage tubules; **G:** A single sperm storage tubule (and visible trapped sperm) from a single  
36  
37 177 fold of the utero-vaginal junction (from a Japanese quail (*Coturnix japonica*)), stained with  
38  
39 178 Hoechst 33342 dye and viewed under a fluorescence microscope.  
40  
41  
42  
43  
44  
45  
46  
47  
48  
49  
50  
51  
52  
53  
54  
55  
56  
57  
58  
59  
60

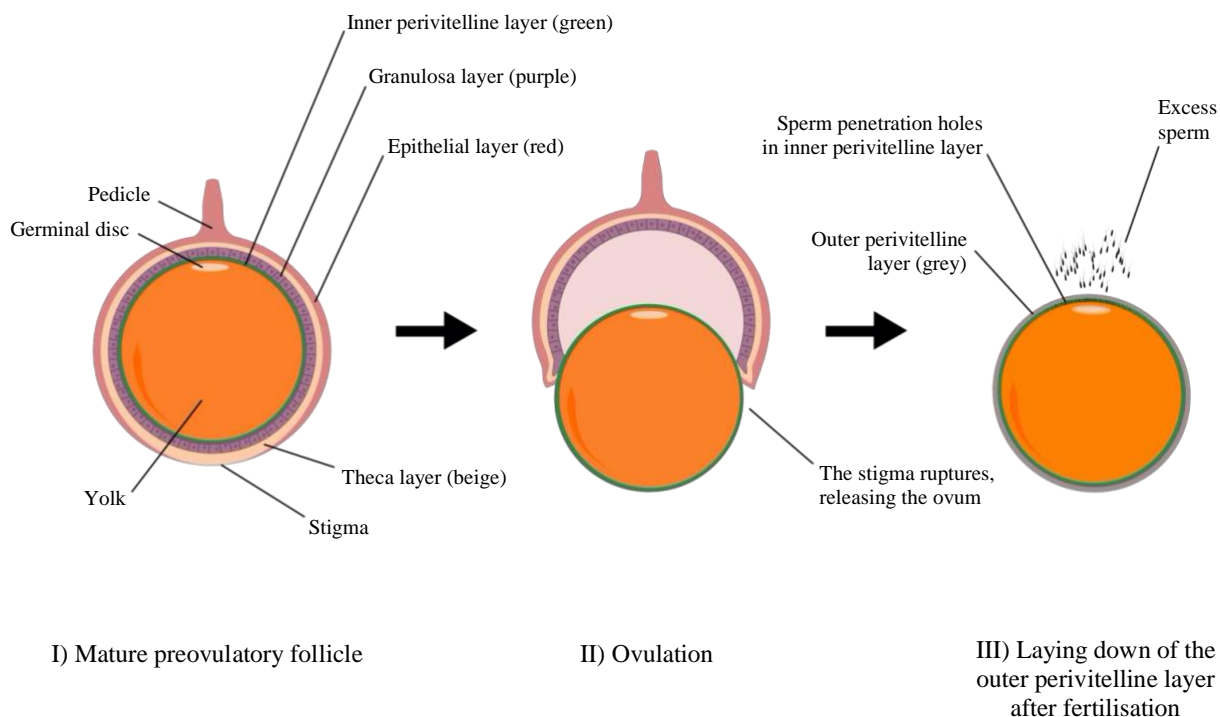

179

180 **Figure 3:** Schematic representation of a mature avian follicle. **I)** An avian follicle prior to  
 181 ovulation; **II)** The ovum and follicle during ovulation, whereby a mature follicle ruptures at  
 182 the stigma region, releasing the ovum. Sperm present in the infundibulum will begin to move  
 183 towards the ovum in preparation for fertilisation, where they will penetrate the inner  
 184 perivitelline layer (green); **III)** The ovum after fertilisation, the outer perivitelline layer  
 185 (grey) has been laid down (which blocks further sperm entry). The inner perivitelline layer  
 186 (green) has an abundance of sperm penetration holes around the germinal disc region where  
 187 sperm have penetrated during fertilisation (see Fig. 2B).

### 188 *b) Ovulation*

189 Ovulation is a complex process under fine hormonal control [22]. It occurs when the largest  
 190 mature yellow follicle (labelled F1 in Fig 2.) ruptures at the stigma region (Fig 3.) [25],  
 191 releasing the ovum which is then captured by the infundibulum – the site of fertilisation. Unlike

1  
2  
3 192 mammals, the granulosa layer provides the main source of gonadal steroids [29], and ovulation  
4  
5 193 is initiated by the production of testosterone in the granulosa cells, which stimulates the release  
6  
7  
8 194 of granulosa cell progesterone. Progesterone then creates a positive feedback response in the  
9  
10 195 hypothalamus which stimulates an increase in the secretion of gonadotropin-releasing  
11  
12 196 hormone, and consequently causes a surge of pituitary luteinising hormone [28,31,32]. Clock  
13  
14 197 genes expressed within granulosa cells after follicle selection are also thought to provide a  
15  
16  
17 198 degree of circadian control over the timing of ovulation [28,33]. Proper regression of the post-  
18  
19 199 ovulatory follicle is thought to be required for managing the timing of ovulation and egg-laying  
20  
21  
22 200 [22], and typically one ovum is released per day.

23  
24 201

25  
26 202 In broiler breeder hens, which have been selected for rapid growth at the expense of fertility,  
27  
28 203 double-yolk eggs are fairly common, and occur more frequently during the onset of  
29  
30 204 egg production [22,34]. Double-yolk eggs are associated with a greater incidence of embryo  
31  
32  
33 205 mortality (at all stages of development) and are also more likely to be infertile [34], possibly  
34  
35 206 because ova are ovulated early and in an immature state. Ovulation order of double-yolk eggs  
36  
37 207 also affects the likelihood of fertilisation: in duck (*Anas platyrhynchos domesticus*) eggs, the  
38  
39 208 first yolk captured by the infundibulum has a higher probability of being fertilised [35]. This  
40  
41 209 may explain why double-yolk eggs commonly contain only one fertilised ovum [34]. Age,  
42  
43 210 nutrition (e.g. feed restriction) and changes in photostimulation are all thought to play a role in  
44  
45 211 the production of double-yolk eggs, the occurrence of which can also be increased via selection  
46  
47 212 [35], indicating a genetic component. In addition to double-yolks, the presence of multiple  
48  
49 213 germinal discs on a single yolk has been reported [36]. However, the cause and incidence of  
50  
51  
52 214 such (and other) ovum abnormalities are unknown, as well as the implications they might have  
53  
54  
55 215 for fertility and embryo development. Chromosomal abnormalities, such as whole genome  
56  
57  
58 216 triploidy, can significantly or completely impair fertility in some affected individuals, and some  
59  
60

1  
2  
3 217 triploid embryos are non-viable and die after a few days of incubation [37]. Triploidy is usually  
4  
5 218 (but not always) maternally derived, and is thought to arise from diploid gametes produced as  
6  
7  
8 219 a result of chromosomal nondisjunction (where homologous chromosomes fail to separate  
9  
10 220 during meiosis) [38,39]. Reports of triploid birds in the wild are rare, possibly because of the  
11  
12 221 reduced survival of triploid embryo's, although the true rate of incidence in wild populations  
13  
14  
15 222 is unknown.

16  
17  
18 223 *c) The female endocrine system*

19  
20  
21 224 The proper functioning of the avian endocrine system is vital for egg production. In seasonally  
22  
23 225 breeding species, photoperiodic cues are received by deep brain photoreceptors that stimulates  
24  
25 226 activity of the hypothalamic-pituitary-gonadal (HPG) axis. The HPG axis is a tightly regulated  
26  
27  
28 227 system that, among other things, regulates physiological processes associated with  
29  
30 228 reproduction [25]. Specifically, following an increase in photoperiod, the mediobasal  
31  
32  
33 229 hypothalamus is stimulated to produce local thyroid hormone which regulates the release of  
34  
35 230 gonadotrophin releasing hormone. This in turn stimulates the pituitary to produce  
36  
37 231 gonadotropins that initiates seasonal gonadal growth and activity [25,40]. Following breeding,  
38  
39  
40 232 the HPG axis is promptly 'switched off', resulting in a significant regression of the gonads  
41  
42 233 [25]. In male Japanese quail (*Coturnix japonica*), lesions of the mediobasal hypothalamus can  
43  
44 234 inhibit the photoperiodic response and gonadal growth [41], but whether such lesions affect  
45  
46 235 seasonal gonad development in females is unclear.

47  
48  
49 236  
50  
51 237 Endocrine disorders such as cystic hyperplasia, cystic ovaries and hypothyroidism are a clinical  
52  
53 238 issue in captive birds [42–46], and there is extensive experimental evidence showing that  
54  
55 239 hormonal disruption can significantly influence egg production. For example, in domestic fowl,  
56  
57  
58 240 administering luteinising hormone 8.5 hours after ovulation causes follicular degeneration  
59  
60

1  
2  
3 241 (atresia) of the next follicle within the follicular hierarchy [47]. An increase in progesterone at  
4  
5 242 the wrong time may induce a spike in luteinising hormone, which triggers premature ovulation  
6  
7 243 [44,48]. Inhibition of luteinising hormone (e.g. via serotonin injections) [48] can lead to  
8  
9 244 anovulation and disruption of thyroid hormone function [49], and in pigeons (*Columba livia*),  
10  
11 245 administering synthetic gonadotropin-releasing hormone can reduce luteinising hormone  
12  
13 246 concentrations, depressing egg production [50]. Ovulation was prevented in domestic fowl  
14  
15 247 treated with the testosterone antagonist flutamide, which blocks the production of pre-  
16  
17 248 ovulatory hormones [51]. Treatment with the inhibin A protein can increase the proliferation  
18  
19 249 of granulosa cells and increase the secretion of granulosa steroid production, whilst decreased  
20  
21 250 expression of the inhibin  $\alpha$  subunit (which has been observed in cystic follicles in pigs [52]) is  
22  
23 251 associated with follicle atresia in chickens [29]. Counterintuitively, injections of follicle  
24  
25 252 stimulating hormone can decrease egg production in zebra finches (*Taeniopygia guttata*),  
26  
27 253 possibly because of a negative feedback effect with endogenous secretion of follicle  
28  
29 254 stimulating hormone [53], although timing of treatment is also likely to be important since the  
30  
31 255 function of follicle stimulating hormone is known to vary with follicle size under normal  
32  
33 256 conditions [25]. Inappropriate levels of the anti-Müllerian hormone have been shown to disrupt  
34  
35 257 normal reproductive development in some species [54,55], and experimentally inhibiting  
36  
37 258 oestrogen synthesis in chicken embryos increases the expression of the anti-Müllerian hormone  
38  
39 259 receptor, resulting in masculinisation of the reproductive tract [56]. The anti-Müllerian  
40  
41 260 hormone is thought to play a vital role in follicular development within the ovary, and elevated  
42  
43 261 levels have been associated with periods of restricted fertility in hens [57]. Elucidating the full  
44  
45 262 significance of the anti-Müllerian hormone for avian female fertility is an active area of  
46  
47 263 research [30,57].  
48  
49  
50  
51  
52  
53  
54  
55  
56 264  
57  
58  
59  
60

1  
2  
3 265 The degree to which hormonal disorders naturally affect wild birds is largely unknown, but  
4  
5 266 exposure of wild birds to environmental Endocrine-Disrupting Compounds (EDCs) has been  
6  
7 267 shown to have a significant impact on fertility [58]. Over 90,000 anthropogenic chemicals are  
8  
9 268 estimated to have been released into the environment; several hundred of these pollutants are  
10  
11 269 confirmed to be EDCs but the majority remain untested for their effects on wildlife [59,60]. If  
12  
13 270 passed onto developing embryos, EDCs can disrupt reproductive development and cause  
14  
15 271 sterility [61]. Negative effects on reproductive success in birds have been observed even when  
16  
17 272 they are exposed to very low and environmentally relevant concentrations of certain EDCs. For  
18  
19 273 example, small amounts of crude oil is sufficient to depress egg yolk formation in seabirds  
20  
21 274 [62,63]; exposure to flame-retardant additives at concentrations typically seen in the  
22  
23 275 environment can depress reproductive success (including fertility) in American kestrels (*Falco*  
24  
25 276 *sparverius*) [64], and in areas polluted with environmental oestrogens, severe reproductive tract  
26  
27 277 abnormalities have been found in exposed females [63]. Toxic heavy metals are also known to  
28  
29 278 act as EDCs and disrupt reproduction in exposed birds: a single dose of cadmium was enough  
30  
31 279 to significantly reduce egg production in Japanese quail [65]; lead is known to accumulate in  
32  
33 280 the ovaries of pheasants (*Phasianus colchicus*) [66], Japanese quail [67] and chickens [68]  
34  
35 281 following exposure, which can reduce egg production and cause histopathological damage and  
36  
37 282 developmental delays in the ovaries; and exposure to mercury (even at very low  
38  
39 283 concentrations) can significantly reduce reproductive success in zebra finches [69]. EDCs have  
40  
41 284 also been shown to disrupt mating behaviour in several seasonally-breeding birds [70] and are  
42  
43 285 linked with population declines [71]. Understanding how EDCs influence reproductive  
44  
45 286 physiology in wild birds is crucial, particularly for endangered birds where even small  
46  
47 287 reductions in fertility can jeopardise species survival [72]. Relatively few long-term studies of  
48  
49 288 wild birds have monitored the effects of EDCs on avian fertility, and in particular there is a  
50  
51 289 lack of knowledge on the population-level effects of EDCs on fertility in wild birds [73,74].  
52  
53  
54  
55  
56  
57  
58  
59  
60

1  
2  
3 290 Detecting the varied and often sublethal effects of EDCs is difficult: wild birds are likely  
4  
5 291 exposed to many different types of EDC at one time [75,76], each with potentially complex  
6  
7  
8 292 and different effects [74]. The risks of EDC exposure to fertility is also likely to differ between  
9  
10 293 species and across individual lifetimes [77]. Identifying the mechanisms by which EDCs affect  
11  
12 294 fertility in wild birds therefore requires a combination of laboratory studies, long-term  
13  
14 295 monitoring, and continued development of analytical methods [74].  
15  
16  
17

18 296 *d) Ovarian disorders and the immune system*  
19  
20

21 297 In humans, ovarian disorders such as hormonal dysfunction, ovarian abnormalities (such as  
22  
23 298 polycystic ovarian disease), premature menopause, and genetic defects [78], explain 30% of  
24  
25 299 female infertility cases. Although less well studied in birds, ovarian disorders are known to  
26  
27  
28 300 reduce or stop egg production in poultry [79], and cystic ovarian disease is common in other  
29  
30 301 bird species (e.g. cockatiels (*Nymphicus hollandicus*), budgerigars (*Melopsittacus undulatus*),  
31  
32  
33 302 and pheasants [80]) [44]. Coelomitis is another common clinical problem in domestic birds,  
34  
35 303 causing inflammation of the ovaries (oophoritis) and ectopic ovulation [80]. The spontaneous  
36  
37 304 development of ovarian cancers is extremely common in the laying hen [25], the incidence of  
38  
39 305 which increases with age, occurring in 24% of hens aged >2 years [81], and 30-35% of hens  
40  
41 306 by 3.5 years [22]. The increase in the incidence of ovarian cancers with age is thought to be, at  
42  
43  
44 307 least in part, a consequence of the accumulation of ovarian surface and DNA damage caused  
45  
46 308 by ovulatory events over time [82]. Laying hens may therefore be at particular risk from  
47  
48 309 ovarian cancers because of the selection for frequent ovulations in commercial breeds [25].  
49  
50 310 Progesterone can be effective at reducing the incidence of ovarian cancers, possibly because it  
51  
52 311 limits the number of ovulations experienced [83]. Increased levels of progesterone have also  
53  
54 312 been implicated in an increase in the number apoptotic events in the ovary, which may act to  
55  
56 313 remove damaged cells [84]. Microbes present in the intestines and cloaca may be transported  
57  
58  
59  
60

1  
2  
3 314 to – and colonise – the ovaries [25]. Viral infections such as avian influenza, infectious  
4  
5 315 bronchitis and avian hepatitis can cause the formation of chronic lesions within the oviduct,  
6  
7 316 that may prevent the successful capture of ova following ovulation [85,86]. This can result in  
8  
9 317 extensive damage to the oviduct [87], often leading to further bacterial infection due to the  
10  
11 318 presence of yolk in the coelomic cavity (egg yolk peritonitis) [88]. Inflammation of the oviduct  
12  
13 319 (such as salpingitis or metritis) caused by bacterial or viral infection can also result in oviductal  
14  
15 320 impaction, egg abnormalities and infertility [44]. Little is known about the incidence of such  
16  
17 321 ovarian disorders, or the degree to which they explain variation in female fertility in wild  
18  
19 322 populations.  
20  
21  
22  
23

323

24  
25  
26 324 The proper functioning of the immune system is of great importance in the defense against  
27  
28 325 bacterial, fungal and viral pathogens within the ovary. Toll-like receptors (TLRs) produced in  
29  
30 326 the follicular tissue of domestic fowl are known to be involved in the recognition of pathogens,  
31  
32 327 and play a key role in inducing an immune response in the ovary [25]. In particular, TLRs  
33  
34 328 respond to pathogenic stimuli by producing avian  $\beta$ -defensins (antimicrobial peptides) and  
35  
36 329 proinflammatory cytokines [89]. TLR signaling may also cause disruption to steroidogenesis,  
37  
38 330 and result in apoptosis of undifferentiated granulosa cells, thereby providing a mechanism to  
39  
40 331 prevent the selection of infected follicles into the preovulatory hierarchy [90]. The adaptive  
41  
42 332 immune response then involves the migration of certain immunocompetent cells into the  
43  
44 333 follicles, including MHC (major histocompatibility complex) antigen presenting cells, T cells,  
45  
46 334 B cells and macrophages [25]. The distribution of immunocompetent cells in the oviduct  
47  
48 335 increases during sexual maturation, but then decreases significantly thereafter with age [91].  
49  
50 336 In humans, ovarian autoimmunity has been associated with premature ovarian failure and  
51  
52 337 infertility [92]. Less is known about the incidence and mechanisms of ovarian autoimmunity  
53  
54 338 in birds (particularly wild populations), but antibodies that target ovarian tissue have been  
55  
56  
57  
58  
59  
60



1  
2  
3 339 identified and been associated with a decline in egg production with age in laying hens [91,93],  
4  
5 340 and autoimmune thyroiditis is a clinical issue associated with obesity and fertility declines in  
6  
7 341 chickens [46]. The frequency of immunocompetent cells present in the follicles of the hen  
8  
9 342 ovary also decreases with age, suggesting a reduction in infection resistance in older hens that  
10  
11 343 could have an associated impact on egg production [94]. The follicular reserve also depletes as  
12  
13 344 birds age [95], inevitably resulting in changes to the HPG axis. This may occur via reduced  
14  
15 345 secretion of gonadal steroids and peptides and/or reduced sensitivity of the hypothalamus to  
16  
17 346 ovarian steroids, either because of diminished steroid stimulation or a general pattern of neural  
18  
19 347 senescence [95]. Oestrogen has been associated with the upregulation of immunocompetent  
20  
21 348 cells into maturing follicles, and so may be involved in the age-related decline of the immune  
22  
23 349 response in the ovary [25,91,94].  
24  
25  
26  
27  
28

29 350 *e) Diet and stress*  
30  
31

32  
33 351 A wealth of experimental evidence in birds (mostly poultry) shows that diet strongly influences  
34  
35 352 egg production and fertility. Striking the balance between optimum nutrient uptake (to  
36  
37 353 maximise production) and nutrient toxicity and/or obesity is of primary concern to the poultry  
38  
39 354 industry [96]. Modern broiler breeder hens are particularly sensitive to over-feeding during the  
40  
41 355 weeks prior to laying, and even minor over-feeding can result in oviducal inflammation,  
42  
43 356 prolapse and a reduction in egg production [97]. When broiler breeder hens are fed *ad libitum*,  
44  
45 357 this can result in obesity and the onset of Erratic Oviposition and Defective Egg Syndrome  
46  
47 358 (EODES), which is thought to be caused by excessive follicle development and the occurrence  
48  
49 359 of multiple follicular hierarchies which disrupts ovulation [97]. Yolk formation is energetically  
50  
51 360 demanding, and requires substantial changes in the body's metabolism of lipids [98].  
52  
53 361 Lipogenesis is responsive to both hormonal control as well as dietary changes, and overfed  
54  
55 362 hens exhibit symptoms of lypotoxicity including ovarian abnormalities and follicular atresia  
56  
57  
58  
59  
60

1  
2  
3 363 [98,99]. Feed restriction is a commonly used method for controlling obesity and the onset of  
4  
5 364 EODES [97,98]. Over the last few decades, intense selection for greater body mass has resulted  
6  
7  
8 365 in an increase in food consumption during *ad libitum* feeding. Consequently, there has been an  
9  
10 366 increase in the use and intensity of feed restriction regimes in broilers [96,98,99]. It is becoming  
11  
12 367 increasingly difficult for poultry breeders to achieve a diet sufficient for growth and  
13  
14 368 reproductive maintenance without over-feeding. Restricted feeding protocols also come with  
15  
16  
17 369 additional welfare issues, namely an increase in stress and social aggressiveness related to  
18  
19 370 hunger [100].  
20

21 371  
22  
23  
24 372 Nutrients thought to be important for egg production and fertility in birds include: manganese;  
25  
26 373 selenium; iodine; fluoride; sodium; zinc; copper; vitamin A; vitamin E; vitamin B<sub>12</sub>; protein  
27  
28 374 and linoleic acid [49,96,101–105]. An excess or deficiency in any of these can be disruptive.  
29  
30 375 Nutritional deficiency and toxicity are common in captive birds but thought to be more rare in  
31  
32 376 wild populations [101], although the dietary requirements and nutrient availability for wild  
33  
34 377 populations are less well studied and may be impacted by environmental change and/or  
35  
36  
37 378 supplemental feeding. In particular, the nutritional needs of endangered populations with  
38  
39 379 reduced natural habitat may be restricted, especially if they have been translocated to habitats  
40  
41  
42 380 with different food sources to those in their native range (but see Jamieson [101]).  
43  
44

45 381  
46  
47 382 It has long been known that stress also plays a vital role in the productivity of laying hens, and  
48  
49 383 stressors may include fear (either of humans [106] or of novel social or physical environments  
50  
51 384 [107]), insufficient space [108] and heat stress [109]. Heat stress reduces egg production by  
52  
53 385 decreasing feed intake and causing nutritional deficiencies, but also by causing widespread  
54  
55  
56 386 disruption to the hormones important for ovulation [109]. In birds, temperatures above 30°C  
57  
58 387 can trigger heat stress [110], and Deng et al. [111] found that when laying hens were exposed  
59  
60

1  
2  
3 388 to 34°C heat for 2 weeks, egg production decreased by 28.8%. Increasing environmental  
4  
5  
6 389 temperatures predicted under climate change is expected to have important repercussions for  
7  
8 390 commercial egg production [110,112]. Evidence for thermally induced female fertility loss in  
9  
10 391 non-commercial species is lacking [113], although in male zebra finches exposed to 30°C and  
11  
12 392 40°C heat there was an increase in the production of abnormal sperm [114]. Regarding wild  
13  
14  
15 393 populations; it is likely that small, isolated or endemic species are particularly vulnerable to  
16  
17 394 heat-stress induced reductions in fertility, because lack of gene flow and genetic variation  
18  
19 395 impose limitations on their ability to adapt to novel environmental stress. Species with limited  
20  
21 396 ranges may also be at risk if they are unable to shift to cooler climates [113]. Early  
22  
23 397 life/developmental conditions and stress may also heavily influence individual patterns of  
24  
25 398 reproductive aging. For example, rates of reproductive senescence are higher in guillemots that  
26  
27 399 invest more heavily in early life reproduction [115]; the effects of early life stress (in the form  
28  
29 400 of predation pressure) increases the rate of reproductive senescence in barn swallows [116];  
30  
31 401 and female collared flycatchers from a low-competition natal environment experience higher  
32  
33 402 reproductive rates early in life, but with a cost of earlier reproductive senescence [117]. We do  
34  
35 403 not fully understand the mechanisms of fertility senescence in birds; more long-term  
36  
37 404 longitudinal studies on age related changes in fertility traits are necessary, especially in wild  
38  
39 405 (non-poultry) species and where environmental/developmental effects are incorporated  
40  
41 406 [115,117–119].  
42  
43  
44  
45  
46  
47

48 407 *f) Egg production: concluding remarks*  
49  
50

51 408 The incidence of infertility resulting from egg production problems is unknown for most wild  
52  
53 409 bird populations, making it difficult to determine how important it is as a driver of individual  
54  
55 410 variation in fitness. Regardless, determining the incidence of egg production dysfunction is a  
56  
57 411 logical step towards establishing the causes of reproductive failure. Future studies should  
58  
59  
60

1  
2  
3 412 (where possible) attempt to collect data on failed breeding attempts (i.e. where copulation was  
4  
5 413 successful, but no eggs were produced), particularly when the fertility status of the male  
6  
7 414 breeding partner is known. This is likely to be somewhat easier for captive populations relative  
8  
9 415 to long-term wild study populations, where data are not routinely collected on non-breeding  
10  
11 416 individuals. Much of the avian fertility literature has a heavy focus on seasonally breeding  
12  
13 417 species, where photoperiod provides a reliable cue eliciting an annual reproductive response.  
14  
15 418 Generally, less is known about tropical/a-seasonal species and opportunistic breeders, where  
16  
17 419 an individual's ability to respond rapidly to more unpredictable environmental cues is likely to  
18  
19 420 significantly influence their fertility.  
20  
21  
22  
23  
24

## 25 421 **(2) Obtaining sperm**

26  
27  
28 422 If ovulation proceeds normally, the ovum progresses into the infundibulum and a second  
29  
30 423 glycoprotein layer is formed around it within approximately 15 minutes, preventing additional  
31  
32 424 sperm from penetrating (Fig 3.). This short fertilisation window requires precise timing of  
33  
34 425 insemination and/or the release of sperm from female storage to ensure sufficient sperm are in  
35  
36 426 the infundibulum at ovulation [120]. Within the female reproductive tract, sperm are stored in  
37  
38 427 blind ended tubular invaginations known as sperm storage tubules (SSTs) [121] found in the  
39  
40 428 utero-vaginal junction (Fig 2.). While SSTs are considered the primary sperm storage site, it  
41  
42 429 has been suggested that sperm may also be stored in the infundibulum. However, evidence for  
43  
44 430 this is equivocal [122].  
45  
46  
47  
48  
49

### 50 431 *a) Copulation*

51  
52  
53 432 Sperm may be prevented from reaching the site of fertilisation in several ways. **Mechanical**  
54  
55 **433 difficulties during mating resulting from physical injury (e.g. impaired vision or balance [44])**  
56  
57 **434 may prevent sperm from entering the reproductive tract.** Clogged feathers (e.g. due to fecal  
58  
59  
60

1  
2  
3 435 build-up, or heavy cloacal feathering) may also block access to the cloaca [45,123], though this  
4  
5 436 may be more likely to occur in captive populations. In captive birds, failed copulation may also  
6  
7 437 occur due to inappropriate husbandry, for example a lack of proper perching or nesting sites,  
8  
9 438 aviary disturbances, a lack of flock stimulation or illness [45]. Immaturity and sexual  
10  
11 439 inexperience may also result in failed mating in young birds [45]. If mating proceeds normally,  
12  
13 440 then females could theoretically ensure sufficient sperm are available for fertilisation by  
14  
15 441 copulating more frequently. Using an experimental approach that restricted inseminations by  
16  
17 442 males, Török et al. [124] showed that multiple copulations were necessary to achieve a normal  
18  
19 443 (unmanipulated) level of egg fertilisation success in wild collared flycatchers (*Ficedula*  
20  
21 444 *ablucollis*), implying copulation frequency is important for fertility assurance [125]. However,  
22  
23 445 multiple copulations could also reduce fertility if they damage the female reproductive tract.  
24  
25 446 Copulation provides an opportunity for bacterial transfer [126,127], which can cause local  
26  
27 447 inflammation in the vaginal wall, impairing sperm transport and reducing fertility [128]. In  
28  
29 448 domestic turkey hens, inflammatory effects of repeated artificial insemination appear to be  
30  
31 449 transient, with quick recovery [129], but the long-term consequences of repeated infections are  
32  
33 450 unknown. The main defense against microbial infection in the oviduct is provided by the  
34  
35 451 vaginal mucosa and associated mucin substances, although ciliary action within the oviduct may  
36  
37 452 also play a role in the removal of microbes [25]. Similarly to the ovary, TLRs and avian  $\beta$ -  
38  
39 453 defensins are also expressed within the rest of the oviduct as well as other antimicrobial  
40  
41 454 defensins such as gallin and cathelicidin [25].  
42  
43  
44  
45  
46  
47  
48  
49  
50

51  
52 456 Timing of insemination relative to ovulation is important for ensuring sperm are available for  
53  
54 457 fertilisation at the right time. Fertility is increased in turkeys when sperm are artificially  
55  
56 458 inseminated immediately before ovulation [130], possibly because sperm are lost passively  
57  
58 459 from storage at a constant rate post-insemination [131]. In contrast, inseminations performed  
59  
60

1  
2  
3 460 immediately before or after egg-laying (egg-release from the cloaca) reduce fertility, possibly  
4  
5 461 because egg-laying contractions impede the ability of sperm to move through the oviduct  
6  
7 462 and/or the passage of sperm is blocked by the egg [23,25]. In chickens, sperm storage is up to  
8  
9  
10 463 40 times more efficient when insemination occurs more than 4 hours after egg-laying [128].  
11  
12 464 Similar evidence of low sperm uptake during and just after egg-laying has also been observed  
13  
14 465 for natural copulations [132].  
15  
16  
17

18 466 *b) Sperm transport to storage*  
19  
20

21 467 Ensuring sufficient sperm are available for fertilisation has clear benefits for the female, but  
22  
23 468 the mechanisms that might facilitate this are at odds with those facilitating female sperm  
24  
25 469 selection. The vagina is considered the main sperm selection site in the avian oviduct  
26  
27  
28 470 [121,133], and only 1% of inseminated sperm make it through to the sperm storage tubules.  
29  
30 471 Domestic fowl, for example, eject the sperm of undesirable males following forced copulations  
31  
32 472 [134], thereby reducing the number of sperm available for fertilisation. The vaginal fluid of  
33  
34 473 female barn swallows (*Hirundo rustica*) has also been shown to reduce sperm performance by  
35  
36 474 varying degrees depending on female quality [135]. Huang et al. [136] found that vagina  
37  
38 475 mucosal tissue of chickens produces exosomes (membrane vesicles enriched in transmembrane  
39  
40 476 proteins) that significantly reduce sperm viability (possibly because they contain cytotoxic  
41  
42 477 factors) and therefore may play a role in sperm selection. During egg production, vaginal pH  
43  
44 478 and immunological activity also varies [23,137], and immune-competent cells appear to be  
45  
46 479 expressed in the vagina [130]. Van Krey et al. [138] found that infertile females express  
47  
48 480 antibody-producing plasma cells in their reproductive tract, and Higaki et al. [139] showed that  
49  
50 481 the number of leukocytes present in the vagina increases following copulation. Localised  
51  
52 482 immune responses are predicted to participate in non-random sperm selection [122], and the  
53  
54 483 likelihood of an anti-sperm response may depend on male genotype [140]. For example, Løvlie  
55  
56  
57  
58  
59  
60

1  
2  
3 484 et al. [141] show that post-copulatory sperm selection in female red junglefowl (*Gallus gallus*)  
4  
5 485 is biased towards males dissimilar at the MHC. Sperm are rapidly coated with immunoglobulin  
6  
7 486 cells produced by the vaginal mucosa, and immunoglobulin IgA and IgG are thought to be at  
8  
9 487 least partially responsible for the massive reduction in sperm viability during transport through  
10  
11 488 the vagina [23]. Determining how female anti-sperm responses vary across individuals is a  
12  
13 489 crucial step towards understanding the importance of the immune response for avian female  
14  
15 490 fertility. Immune response strength likely depends on complex phenotypic trade-offs between  
16  
17 491 fertility and infection resistance [142], similar to the trade-off females face between fertility  
18  
19 492 and sperm quality during sperm selection. If sperm selection and/or immune response  
20  
21 493 mechanisms are too effective, insufficient sperm may reach the site of fertilisation. Sperm  
22  
23 494 selection and transport in the vagina may therefore be considered a balance between selecting  
24  
25 495 high quality sperm, avoiding infection, and ensuring sufficient sperm remain available for  
26  
27 496 fertilisation.  
28  
29  
30  
31  
32  
33

### 34 497 *c) Sperm storage tubule function*

35  
36  
37 498 Once sperm are in storage, the proper functioning of the SSTs is likely to be crucial to fertility,  
38  
39 499 and a decline in sperm storage ability has been associated with fertility senescence in birds  
40  
41 500 [143]. The number of sperm stored is strongly associated with the number that reach the ovum  
42  
43 501 [144], and chickens selected for high fertility have significantly greater numbers of SSTs [130].  
44  
45 502 The mechanisms controlling sperm acceptance, storage and release are assumed to be under  
46  
47 503 fine temporal control based on hormonal changes [145]. Fertilisation failure is therefore likely  
48  
49 504 if hormonal imbalances result in a mismatch between the timing of ovulation and arrival of  
50  
51 505 sperm in the infundibulum [122,145]. The significant variation in fertile periods across species  
52  
53 506 has been attributed to differences in SST number and therefore sperm storage capacity [122],  
54  
55  
56  
57  
58  
59  
60

1  
2  
3 507 but intra- and inter- specific variation in the structure and function sperm storage tubules has  
4  
5 508 not yet been quantified.

6  
7  
8 509

9  
10 510 The mechanisms by which sperm are maintained in a viable state in the SSTs are not fully  
11  
12 511 understood, but it is thought that numerous compounds are produced to maintain a suitable  
13  
14 512 environment for long-term sperm survival [122,146]. Recent work provides some experimental  
15  
16 513 evidence to support this. For example, lactic acid – now known to be produced in SST cells in  
17  
18 514 response to hypoxic conditions – can induce a reduction in sperm flagellar movement and so  
19  
20 515 may contribute to the quiescence of Japanese quail sperm [25,147]. Additionally, Huang et al.  
21  
22 516 [148] identified a number of fatty acids in the UVJ mucosa of domestic fowl, which have also  
23  
24 517 been shown to depress rooster sperm motility, and *in vitro* sperm survival was found to be  
25  
26 518 higher in the presence of oleic and linoleic acid. They also found that SST cells express lipid  
27  
28 519 receptors, which may enable lipid droplets to accumulate and be used by resident sperm to  
29  
30 520 maintain structural integrity. SST cells in turkeys are also known to shed microvillus vesicles  
31  
32 521 that interact with sperm, transferring metabolic substrates that may be capable of temporarily  
33  
34 522 inhibiting fertilising ability, protecting from oxidative stress, and transporting fluid from the  
35  
36 523 SST cells into the SST lumen [149]. Whilst evidence suggests that these compounds play a key  
37  
38 524 part in sperm maintenance, there are likely a number of other important compounds expressed  
39  
40 525 in SSTs that have yet to be discovered [25]. The degree to which individuals and species vary  
41  
42 526 in their ability to maintain sperm in storage is not clear, but this may play an important role in  
43  
44 527 determining female fertility.

45  
46  
47 528

48  
49 529 One factor that is essential for sperm survival in storage is the suppression of the female  
50  
51 530 immune response, which if triggered can have highly detrimental effects on sperm. In domestic  
52  
53 531 fowl, repeated artificial inseminations were associated with a complete lack of stored sperm  
54  
55  
56  
57  
58  
59  
60



1  
2  
3 532 and a 57% decrease in fertility [150,151]. This has been attributed to an influx of lymphocytes  
4  
5 533 and antigen-presenting cells into SSTs that likely impair sperm survivability, but also prevent  
6  
7 534 sperm from entering storage [150]. A significant decrease in the expression of oestrogen  
8  
9 535 receptors in the sperm storage tubules was also observed following infection, likely impairing  
10  
11 536 the hormonal control of sperm storage tubule function [151]. Das et al. [152] demonstrated  
12  
13 537 enhanced local expression of transforming growth factor  $\beta$  (TGF $\beta$ ) within sperm storage  
14  
15 538 tubules, which suppresses the anti-sperm immune response by depressing the activity of  
16  
17 539 lymphocytes.  
18  
19  
20  
21

22 540

23  
24 541 As the rate of sperm release from storage increases, the duration of fertility will decline unless  
25  
26 542 more sperm are inseminated [23]. Older hens tend to release sperm faster, possibly due to a  
27  
28 543 decline in hormone production needed to regulate ovulation and sperm release [153]. This may  
29  
30 544 partially explain why older hens have shorter fertile periods [23]. The mechanisms of sperm  
31  
32 545 release are not fully understood, but SSTs have been shown to possess a constricted ‘gate-like’  
33  
34 546 entrance, that may act as a physical (and/or selective) barrier preventing sperm from leaving  
35  
36 547 [154]. Constriction is likely to be hormonally triggered, since progesterone has been shown to  
37  
38 548 induce contractions of the SSTs, and images taken using electron microscopy show sperm  
39  
40 549 leaving the SSTs after intravenous injection with progesterone [155]. Furthermore, the specific  
41  
42 550 membrane progesterin receptor mPR $\alpha$  has been shown to be expressed within SSTs of Japanese  
43  
44 551 Quail [155]. Additionally, in a comprehensive study, Hiyama et al. [156] demonstrated that  
45  
46 552 heat shock protein 70 (HSP70) - a widespread and highly conserved molecular chaperone – is  
47  
48 553 expressed in the utero-vaginal junction and its expression increases prior to ovulation. They  
49  
50 554 also found that HSP70 binds to sperm and stimulates flagellar movement *in vitro*, and injection  
51  
52 555 of an HSP70 antibody significantly reduces fertilisation success *in vivo*. Hiyama et al. speculate  
53  
54 556 that HSP70 expression in the UVJ may be stimulated by progesterone; the progesterone surge  
55  
56  
57  
58  
59  
60

1  
2  
3 557 experienced prior to ovulation may therefore function in part to allow sperm to be released  
4  
5 558 from storage at the right time whilst also ensuring sperm regain function. Imbalances in  
6  
7 559 circulating progesterone levels can be triggered by conditions such as nutrient toxicity (e.g.  
8  
9 560 excess fluoride [105]) and heat stress [157], and future work should explore if such imbalances  
10  
11 561 reduce fertility by disrupting sperm release from storage.  
12  
13  
14

15  
16 562 *d) Sperm transport to the site of fertilisation*  
17  
18

19 563 Once released from storage, sperm are thought to travel passively through the uterus, isthmus  
20  
21 564 and magnum (Fig.2) [122], as evidenced by the fact that dead sperm inseminated beyond the  
22  
23 565 utero-vaginal junction reach the infundibulum in as great numbers as live sperm [158]. Past the  
24  
25 566 utero-vaginal junction the reproductive tract is apparently free of immunoglobulins, and anti-  
26  
27 567 peristaltic activity is thought to aid in the passive and rapid transport of sperm to the  
28  
29 568 infundibulum, [159] where they remain until fertilisation [122].  
30  
31  
32  
33

34 569 **(3) Achieving fertilisation**  
35  
36  
37

38 570 Following successful ovulation, the avian ovum is captured by the infundibulum where it  
39  
40 571 encounters sperm. Successful fertilisation involves the initiation of multiple events in  
41  
42 572 sequence: sperm-egg binding, acrosomal exocytosis, sperm penetration through the  
43  
44 573 perivitelline layer and fusion of the male and female pronuclei in the germinal disc. The  
45  
46 574 mechanisms of sperm-egg interactions in birds are not well understood, but the roles of several  
47  
48 575 important molecules have been discovered.  
49  
50  
51

52 576 *a) The inner perivitelline layer*  
53  
54

55  
56 577 The inner perivitelline layer (IPVL), which is homologous to the zona pellucida (ZP) in  
57  
58 578 mammals, is composed of a mesh of fibre that forms a 3-dimensional extracellular matrix.  
59  
60

1  
2  
3 579 Unlike in mammals, the IPVL of birds does not inhibit polyspermy [26], and in fact a degree  
4  
5 580 of physiological polyspermy is required for normal development in birds [120]. The IPVL  
6  
7 581 contains at least six ZP glycoproteins [14] (there has been significant confusion in the literature  
8  
9 582 regarding the nomenclature of ZP proteins [160], here we provide the common aliases in  
10  
11 583 parentheses), most notably ZP1 (ZPB1) and ZP3 (ZPC) which are major components of the  
12  
13 584 IPVL and play a key role in the binding of sperm and initiation of the acrosome reaction  
14  
15 585 [14,26]. Additionally, ZP2 (ZPA) has been found in the IPVL, but to a lesser extent, and  
16  
17 586 accumulates primarily in the germinal disc region in chickens [161], but not turkeys.  
18  
19 587 Interestingly, it is ZP4 (ZPB or ZPB2) that accumulates in the germinal disc region in the  
20  
21 588 turkey [6], suggesting differences in sperm binding mechanisms may occur across species.  
22  
23 589 Other minor constituents of the IPVL include ZPAX (ZPX1) and ZPD (UMOD), where ZPD  
24  
25 590 has been found to be important for initiation of the acrosome reaction [26]. Acrosin, located in  
26  
27 591 the sperm plasma membrane, was discovered to be a complimentary molecule that supports the  
28  
29 592 binding of sperm to the ZP proteins in quail PVL [14].  
30  
31  
32  
33  
34  
35  
36  
37

38 594 In mammals, a variety of protein coding genes associated with gamete cell surfaces have been  
39  
40 595 discovered [162–164]. This includes Juno and Izumo – the only known interacting pair of  
41  
42 596 sperm-egg adhesion proteins. Izumo is a sperm protein [165], and Juno is the more recently  
43  
44 597 discovered egg Izumo receptor [166]. In mice, Juno and Izumo knockouts result in sterility,  
45  
46 598 and Juno is vital in preventing polyspermy; its rapid loss from the egg surface membrane  
47  
48 599 following fertilisation causes the blocking of the zona pellucida to further sperm entry [166].  
49  
50 600 Reproductive proteins are known to evolve rapidly compared to many other gene classes, and  
51  
52 601 both Juno and Izumo have been found to be under positive selection in mammals [167]. No  
53  
54 602 such interacting proteins have been discovered in birds: comparisons of the genomic regions  
55  
56 603 containing Juno (and surrounding loci) in mice and humans with that of the chicken shows that  
57  
58  
59  
60

1  
2  
3 604 they are generally syntenic (the gene order is conserved), however Juno loci are absent in the  
4  
5 605 chicken [25]. A key step for avian fertility research will be to identify avian Juno and Izumo  
6  
7 606 equivalents. Also essential for sperm-egg fusion is the ubiquitously expressed membrane  
8  
9 607 protein CD9: female (but not male) CD9 knockout mice are infertile [164] - CD9 was the first  
10  
11 608 identified gene with female specific fertility effects [168]. There is one known homologue of  
12  
13 609 CD9 in the chicken (ID: AB032767) though to our knowledge no studies have explored the  
14  
15 610 involvement of this (or any other gene) on sperm-egg fusion in birds [25].  
16  
17  
18  
19

20 611 *b) Sperm-egg interaction and syngamy*  
21  
22

23 612 Diagrammatic representations of fertilisation often depict the ovum oriented such that the  
24  
25 613 germinal disc faces towards the reproductive tract (and oncoming sperm). However, we suggest  
26  
27 614 that the animal pole – where the germinal disc is located - faces towards the ovary during  
28  
29 615 ovulation and fertilisation (Fig 3.), because the ovum is in that orientation whilst inside the  
30  
31 616 follicle [25], and to our knowledge there is no known mechanism by which it would turn to  
32  
33 617 face the opposite direction after ovulation. If true, the consequence is that sperm would have  
34  
35 618 to travel around the ovum to reach the tiny germinal disc target. Sperm are known to bind to  
36  
37 619 the germinal disc region in higher concentrations than elsewhere on the ovum [161], suggesting  
38  
39 620 there must be an underlying mechanism by which sperm locate and/or preferentially bind to  
40  
41 621 this region. **Such a mechanism** has yet to be discovered, but Nishio et al. [161] suggest that  
42  
43 622 sperm may locate the germinal disc region via egg chemo-attractants, and/or by utilising site-  
44  
45 623 specific egg coat receptors. The PVL glycoproteins ZP2 and ZP4 are promising receptor  
46  
47 624 candidates, since ZP2 and ZP4 are concentrated primarily in the germinal disc region of  
48  
49 625 chicken and turkey PVL respectively, but their sperm binding properties have yet to be  
50  
51 626 investigated [6,14,161]. Recently, a number of new PVL proteins have been identified which  
52  
53  
54  
55  
56  
57  
58  
59  
60

1  
2  
3 627 appear to vary across species (see Damaziak et al., [169]), but their function in fertilisation has  
4  
5 628 not yet been determined.  
6  
7

8 629

9  
10 630 Once bound with the PVL, the sperm acrosomal contents (including proteases and  
11  
12 631 endopeptidases) are released during the acrosomal reaction and locally degrade the PVL,  
13  
14 632 forming a hole via which sperm can penetrate the ovum [14,25]. Sperm penetration holes are  
15  
16  
17 633 visible on the PVL *in vitro* (Fig. 2 B) and can be used as a reliable proxy for the number of  
18  
19 634 sperm that reach the ovum [170,171]. Following the acrosomal reaction, the inner acrosomal  
20  
21 635 membrane of sperm becomes exposed, binds to the ovum and the male pronucleus is released.  
22  
23 636 While multiple sperm can penetrate the PVL in birds, only one male pronucleus typically fuses  
24  
25 637 with the female pronucleus in the germinal disc – though the exact mechanisms of avian  
26  
27 638 syngamy remain unknown [25]. Supernumerary male pronuclei are degraded by DNAses in  
28  
29 639 the germinal disc and PVL of mature oocytes [172]. During or immediately after fertilisation,  
30  
31 640 a granular continuous layer is laid down around the ovum, followed by the outer perivitelline  
32  
33 641 layer (OPVL), which blocks further sperm entry (Fig 3.) [25]. The OPVL is multi-layered and  
34  
35 642 composed of proteins secreted by the infundibular mucosa [173]. Macrophages present within  
36  
37 643 the infundibulum are thought to function in the phagocytosis of superfluous sperm (i.e. those  
38  
39 644 that did not participate in fertilisation) [174].  
40  
41  
42  
43  
44

#### 45 645 *c) Variation in egg quality*

46  
47  
48  
49 646 In addition to proteins, the consistency and structure of the IPVL differs markedly between  
50  
51 647 species. For example, Damaziak et al. [169] observed that cockatiels have a more densely and  
52  
53 648 irregularly arranged IPVL than that of three other species studied (pigeons, grey partridges  
54  
55 649 (*Perdix perdix*) and pheasants). They also found that the pigeon PVL is markedly different in  
56  
57 650 structure; its numerous sublayers are more homogenous, less porous and unusually loose in  
58  
59  
60

1  
2  
3 651 arrangement compared with the other species. Pigeon PVL is also composed of flat sheets  
4  
5 652 rather than the cylindrical fibers which are observed in the PVL of all the other species. It is  
6  
7  
8 653 unknown how this variation in structure affects the integrity of the PVL, its interaction with  
9  
10 654 sperm, or whether this variation corresponds to post-copulatory sexual selection intensity  
11  
12 655 and/or sperm traits. Damaziak et al. suggest that interspecific variation in PVL structure may  
13  
14 656 be related to differences in the function of the PVL during embryo development, which may  
15  
16 657 vary depending on whether the species is precocial or superaltricial. The germinal disc region  
17  
18 658 is also known to show subtle intra- and inter-specific variation in terms of morphology, and  
19  
20 659 also in terms of the location, size and number of sperm penetration holes [175]. It is currently  
21  
22 660 unknown how variation in PVL structure affects fertility, but fertilisation rates are positively  
23  
24 661 correlated with the number of sperm that penetrate the PVL [176]. There is known to be  
25  
26 662 variation in how readily sperm can bind to the PVL [133,177], and it seems logical that intra-  
27  
28 663 and inter-specific differences in PVL structure may affect how easy it is for sperm to bind to  
29  
30 664 and penetrate the PVL. In taxa where polyspermy is lethal to the egg (such as in mammals),  
31  
32 665 egg ‘fertilisability’ is known to vary according to the risk of polyspermy [178]. Consequently,  
33  
34 666 females and males will be locked in an apparent cycle of co-evolutionary conflict where  
35  
36 667 females are selected for greater ‘egg defensiveness’ (resistance to sperm) and males selected  
37  
38 668 to counter this with greater fertilising ability and competitiveness [18]. Currently, egg  
39  
40 669 defensiveness has been most largely explored in sea urchins and in mice [19,178], with  
41  
42 670 virtually nothing known in birds. Since polyspermy is a normal and important part of  
43  
44 671 fertilisation in birds, this suggests that mechanisms of polyspermy avoidance are unlikely to be  
45  
46 672 important other than to prevent excessive sperm penetration that might damage the integrity of  
47  
48 673 the ovum. Theoretically, females might be expected to evolve mechanisms of resistance to  
49  
50 674 sperm for other reasons, for example to alleviate the costs of hybridisation, avoid incompatible  
51  
52 675 sperm, or as a mechanism of selection for high quality sperm [19,179]. Indeed, evidence  
53  
54  
55  
56  
57  
58  
59  
60

1  
2  
3 676 suggests that the strength of positive selection on gamete-recognition genes is similar between  
4  
5 677 birds and mammals, suggesting that in the absence of polyspermy avoidance, there must be  
6  
7  
8 678 some other adaptive mechanism to explain the rapid evolution of avian gamete-recognition  
9  
10 679 genes [179]. Recently, Hurley et al. [170] found significant variation in PVL sperm numbers  
11  
12 680 between breeding pairs of estrildid finches, as well as variation in PVL sperm numbers across  
13  
14 681 the laying order. It was unclear however, if this variation was male or female mediated.  
15  
16 682 Exploring the degree of variation in egg quality, egg defensiveness and sperm selection at the  
17  
18 683 gametic level is challenging but important for elucidating the full role of the avian ovum for  
19  
20 684 fertility.  
21  
22  
23

24 685

26 686 Whether other aspects of ovum quality, such as the integrity of DNA in the female pronucleus,  
27  
28 687 influence the likelihood of successful sperm-ovum fusion remains unknown. In mammals,  
29  
30 688 heritable mutations of ZP2 and ZP3 are known to cause infertility [180], and antibodies raised  
31  
32 689 against ZP proteins can depress ovarian function [6]. Investigating the incidence of similar  
33  
34 690 ovum abnormalities and immunological activity, and the degree to which they might affect  
35  
36 691 avian fertility, may be a fruitful avenue for future research.  
37  
38  
39  
40

#### 41 692 **IV. Conclusions and future directions**

42  
43  
44

45 693 It is clear that females can exert far more control over fertilisation than has historically been  
46  
47 694 assumed, but if and how females influence whether their ova are successfully fertilised is  
48  
49 695 often ignored in favour of male processes (such as sperm quality and quantity) [6]. Here we  
50  
51 696 have quantitatively demonstrated that there is a bias in research effort towards the study of  
52  
53 697 male fertility rather than female fertility in birds. We also show that the vast majority of  
54  
55 698 avian fertility research has focussed on captive populations, with a further taxonomic bias  
56  
57 699 towards gallinaceous birds and the domestic chicken in particular. We have also highlighted  
58  
59  
60

1  
2  
3 700 key advances and gaps in knowledge on the role of female physiological processes in  
4  
5 701 determining fertilisation success. In particular, the field would benefit from more studies  
6  
7 702 investigating variation in fertility in non-poultry species (i.e. that have not undergone intense  
8  
9 703 artificial selection for high productivity), and wild populations. Within wild birds, more  
10  
11 704 attention to a-seasonal/tropical species, and opportunistic breeders would also be valuable.  
12  
13 705 Although we acknowledge that detailed study of variation in female fertility may be difficult  
14  
15 706 in wild populations, because information about non-breeders is not always easy to collect, we  
16  
17 707 nonetheless urge that such efforts are made, particularly in non-poultry species and managed  
18  
19 708 and/or experimental populations where male processes can be controlled for. If studies are  
20  
21 709 unable to monitor failed breeders (i.e. those that did not produce any eggs following a  
22  
23 710 successful copulation), it would be useful to acknowledge that infertility may be  
24  
25 711 underestimated.

26  
27  
28  
29  
30  
31 712  
32  
33 713 When investigating reproductive failure, the fact that infertility and embryo mortality are  
34  
35 714 fundamentally distinct processes needs to be explicitly stated. Specifically, that infertility is  
36  
37 715 used to describe failed fertilisation, and any process contributing to failed fertilisation is a  
38  
39 716 mechanism of infertility (rather than embryo mortality). Similarly, if an egg fails to hatch but  
40  
41 717 was fertilised, then the cause of hatching failure must be referred to as embryo mortality,  
42  
43 718 even if development arrested after only a few cell divisions. If fertility status cannot be  
44  
45 719 unequivocally determined using the appropriate techniques (see Birkhead et al. [10]), then the  
46  
47 720 mechanisms of hatching failure cannot be conclusively known. Very early embryo mortality  
48  
49 721 is likely to be mistaken for infertility when using traditional methods (e.g. candling or  
50  
51 722 macroscopic examination), which may result in an overestimation of infertility [9]. Moving  
52  
53 723 forward, a clearer estimation of the incidence of infertility in a given population will require a  
54  
55  
56  
57  
58  
59  
60



1  
2  
3 724 combination of both careful monitoring (to identify failed breeders) as well as an accurately  
4  
5 725 determined fertilisation status for unhatched eggs.  
6  
7  
8 726

9  
10 727 The female reproductive tract typically offers a hostile environment for sperm, providing  
11  
12 728 considerable potential for female processes to influence sperm survival and transport to the  
13  
14 729 ovum. While the processes of sperm selection, storage, release and transport within the  
15  
16 730 reproductive tract has received increasing research attention over the past few decades, we  
17  
18 731 still lack fundamental understanding of the underlying mechanisms, and the degree of intra-  
19  
20 732 and inter-specific variation in these processes, with the vast majority of work having focussed  
21  
22 733 on a very limited number of domestic species. Many of the female-mediated processes  
23  
24 734 required for high fertility also deteriorate to some degree with age, making fertility problems  
25  
26 735 more likely in older birds. This may have particularly important consequences for captive and  
27  
28 736 managed threatened populations, where individuals may reproduce to an older age than their  
29  
30 737 wild counterparts, due to reduced predation and competition pressure, and high accessibility  
31  
32 738 of food and other resources. The field of avian reproductive science will also benefit from  
33  
34 739 better understanding the impact of other factors on female fertility, such as stress, hormonal  
35  
36 740 and physiological disorders (particularly in wild birds); environmental pollutants, intra- and  
37  
38 741 inter- individual variation in egg production, egg quality, sperm selection, and the female  
39  
40 742 immune response within the oviduct (including the ovaries).  
41  
42  
43  
44  
45  
46  
47  
48

49 744 The causes and maintenance of variation in fertility is a key question in evolutionary biology,  
50  
51 745 and one in which the role of the female is often sidelined. Our hope is that this review  
52  
53 746 challenges the field of avian reproductive science and evolutionary biology to consider  
54  
55 747 female processes to a greater degree when investigating the causes of depressed fertility in  
56  
57 748 birds. Using birds as a model system for the study of female fertility across taxa presents  
58  
59  
60

1  
2  
3 749 several advantages and will provide insights not only in the field of reproductive biology, but  
4  
5 750 also for fields such as conservation and commercial animal breeding as well.  
6  
7  
8

## 9 751 **V. Acknowledgments**

10  
11  
12  
13 752 We thank Karl Evans and Ben Hatchwell for helpful and insightful comments on a draft of  
14  
15 753 this manuscript. K.A was supported by the Natural Environment Research Council ACCE  
16  
17 754 Doctoral Training Partnership (grant number NE/S00713X/1), P.B was supported by an  
18  
19 755 institute of Zoology Fellowship and N.H was supported by the Royal Society (Dorothy  
20  
21  
22 756 Hodgkin Fellowship DH160200).  
23  
24

## 25 757 **VI. References**

- 26  
27  
28  
29 758 1. Greenway GE V., Balfour VL, Shuker DM. 2017 Can females choose to avoid mating  
30  
31 759 failure in the seed bug *Lygaeus simulans*? *Anim. Behav.* **129**, 61–69.  
32  
33 (doi:10.1016/j.anbehav.2017.05.004)  
34 760  
35  
36 761 2. Koenig WD. 1982 Ecological and social factors affecting hatchability of eggs. *Auk* **99**,  
37  
38 762 526–536. (doi:10.1093/auk/99.3.526)  
39  
40  
41 763 3. Lifjeld J, Laskemoen T, Fossøy F, Johnsen A, Kleven O. 2007 Functional infertility  
42  
43 764 among territorial males in two passerine species, the willow warbler *Phylloscopus*  
44  
45 765 *trochilus* and the bluethroat *Luscinia svecica*. *J. Avian Biol.* **38**, 267–272.  
46  
47 (doi:10.1111/j.2007.0908-8857.04126.x)  
48 766  
49  
50 767 4. Morrow EH, Arnqvist G, Pitcher TE. 2002 The evolution of infertility: Does hatching  
51  
52 768 rate in birds coevolve with female polyandry? *J. Evol. Biol.* **15**, 702–709.  
53  
54 769 (doi:10.1046/j.1420-9101.2002.00445.x)  
55  
56  
57 770 5. Hayward A, Gillooly JF. 2011 The cost of sex: Quantifying energetic investment in  
58  
59 771 gamete production by males and females. *PLoS One* **6**, 16557.  
60

- 1  
2  
3 772 (doi:10.1371/journal.pone.0016557)  
4  
5 773 6. Benson AP, Malloy MN, Steed JR, Christensen VL, Fairchild BD, Davis AJ. 2017  
6  
7 774 Zona pellucida protein B2 messenger ribonucleic acid expression varies with follicular  
8  
9 775 development and granulosa cell location. *Poult. Sci.* **96**, 3414–3421.  
10  
11 776 (doi:10.3382/ps/pex126)  
12  
13 777 7. Johnson MH. 2018 *Essential Reproduction*. Eighth. Wiley-Blackwell.  
14  
15 778 8. Hemmings N, West M, Birkhead TR. 2012 Causes of hatching failure in endangered  
16  
17 779 birds. *Biol. Lett.* **8**, 964–967. (doi:10.1098/rsbl.2012.0655)  
18  
19 780 9. Hemmings N, Evans S. 2020 Unhatched eggs represent the invisible fraction in two  
20  
21 781 wild bird populations. *Biol. Lett.* **16**, 20190763. (doi:10.1098/rsbl.2019.0763)  
22  
23 782 10. Birkhead TR, Hall J, Schut E, Hemmings N. 2008 Unhatched eggs: Methods for  
24  
25 783 discriminating between infertility and early embryo mortality. *Ibis (Lond. 1859)*. **150**,  
26  
27 784 508–517. (doi:10.1111/j.1474-919X.2008.00813.x)  
28  
29 785 11. Beaumont C, Millet N, Le Bihan-Duval E, Kipi A, Dupuy V. 1997 Genetic parameters  
30  
31 786 of survival to the different stages of embryonic death in laying hens. *Poult. Sci.* **76**,  
32  
33 787 1193–1196. (doi:10.1093/ps/76.9.1193)  
34  
35 788 12. Heber S, Briskie J V. 2010 Population bottlenecks and increased hatching failure in  
36  
37 789 endangered birds. *Conserv. Biol.* **24**, 1674–1678. (doi:10.1111/j.1523-  
38  
39 790 1739.2010.01553.x)  
40  
41 791 13. Jamieson IG, Ryan CJ. 2000 Increased egg infertility associated with translocating  
42  
43 792 inbred takahe (*Porphyrio hochstetteri*) to island refuges in New Zealand. *Biol.*  
44  
45 793 *Conserv.* **94**, 107–114. (doi:10.1016/S0006-3207(99)00158-5)  
46  
47 794 14. Ichikawa Y, Matsuzaki M, Hiyama G, Mizushima S, Sasanami T. 2016 Sperm-egg  
48  
49 795 interaction during fertilization in birds. *J. Poult. Sci.* **53**, 173–180.  
50  
51 796 (doi:10.2141/jpsa.0150183)  
52  
53  
54  
55  
56  
57  
58  
59  
60

- 1  
2  
3 797 15. Lüpold S, Reil JB, Manier M, Zeender V, Belote J, Pitnick S. 2020 Female × male and  
4  
5 798 male × male interactions have limited influence on competitive fertilization in  
6  
7 799 *Drosophila melanogaster*. *Evol. Lett.* **4**, 416–429. (doi:10.1002/evl3.193)  
8  
9  
10 800 16. Blesbois E. 2007 Current status in avian semen cryopreservation. *Worlds. Poult. Sci. J.*  
11  
12 801 **63**, 213–222. (doi:10.1017/S0043933907001419)  
13  
14 802 17. Martin E. 1991 The egg and the sperm : How science has constructed a romance based  
15  
16 803 on stereotypical male-female roles. *Univ. Chicago Press journals* **16**, 485–501.  
17  
18 804 (doi:10.1086/494680)  
19  
20  
21 805 18. Firman RC. 2020 Of mice and women: advances in mammalian sperm competition  
22  
23 806 with a focus on the female perspective. *Philos. Trans. R. Soc. B Biol. Sci.* **375**,  
24  
25 807 20200082. (doi:10.1098/rstb.2020.0082)  
26  
27  
28 808 19. Firman RC, Gasparini C, Manier MK, Pizzari T. 2017 Postmating Female Control: 20  
29  
30 809 Years of Cryptic Female Choice. *Trends Ecol. Evol.* **32**, 368–382.  
31  
32 810 (doi:10.1016/j.tree.2017.02.010)  
33  
34  
35 811 20. Vézina F, Williams TD. 2002 Metabolic costs of egg production in the European  
36  
37 812 starling (*Sturnus vulgaris*). *Physiol. Biochem. Zool.* **75**, 377–385.  
38  
39 813 (doi:10.1086/343137)  
40  
41  
42 814 21. Houston DC, Donnan D, Jones PJ. 1995 The source of the nutrients required for egg  
43  
44 815 production in zebra finches *Poephila guttata*. *J. Zool.* **235**, 469–483.  
45  
46 816 (doi:10.1111/j.1469-7998.1995.tb01763.x)  
47  
48  
49 817 22. Johnson AL. 2014 The avian ovary and follicle development: Some comparative and  
50  
51 818 practical insights. *Turkish J. Vet. Anim. Sci.* **38**, 660–669. (doi:10.3906/vet-1405-6)  
52  
53  
54 819 23. Bakst MR, Wishart G, Brillard J-P. 1994 Oviducal sperm selection, transport, and  
55  
56 820 storage in poultry. *Poult. Sci. Rev.* **5**, 117–143.  
57  
58  
59 821 24. Hung-Chang Yao H, Volentine KK, Bahr JM. 1998 Destruction of the germinal disc  
60

- 1  
2  
3 822 region of an immature preovulatory chicken follicle induces atresia and apoptosis.  
4  
5 823 *Biol. Reprod.* **59**, 516–521. (doi:10.1095/biolreprod59.3.516)  
6  
7  
8 824 25. Sasanami T. 2017 *Avian Reproduction: From Behaviour to Molecules*. 1st edn.  
9  
10 825 Springer Singapore. (doi:10.1007/978-981-10-3975-1)  
11  
12 826 26. Rodler D, Sasanami T, Sinowatz F. 2012 Assembly of the inner perivitelline layer, a  
13  
14 827 homolog of the mammalian zona pellucida: An immunohistochemical and  
15  
16 828 ultrastructural study. *Cells Tissues Organs* **195**, 330–339. (doi:10.1159/000327013)  
17  
18  
19 829 27. Johnson AL. 2015 Ovarian follicle selection and granulosa cell differentiation. *Poult.*  
20  
21 830 *Sci.* **94**, 781–785. (doi:10.3382/ps/peu008)  
22  
23  
24 831 28. Kim D, Johnson AL. 2016 Vasoactive intestinal peptide promotes differentiation and  
25  
26 832 clock gene expression in granulosa cells from prehierarchical follicles. *Mol. Reprod.*  
27  
28 833 *Dev.* **83**, 455–463. (doi:10.1002/mrd.22641)  
29  
30  
31 834 29. Cui Z, Liu L, Zhu Q, Wang Y, Yin H, Li D, Tian Y, Shu G, Zhao X. 2020 Inhibin A  
32  
33 835 regulates follicular development via hormone secretion and granulosa cell behaviors in  
34  
35 836 laying hens. *Cell Tissue Res.* **381**, 337–350. (doi:10.1007/s00441-020-03207-8)  
36  
37  
38 837 30. Scanes CG. 2017 Grand and less grand challenges in avian physiology. *Front. Physiol.*  
39  
40 838 **8**, 222. (doi:10.3389/fphys.2017.00222)  
41  
42  
43 839 31. Rangel PL, Gutierrez CG. 2014 Reproduction in hens: Is testosterone necessary for the  
44  
45 840 ovulatory process? *Gen. Comp. Endocrinol.* **203**, 250–261.  
46  
47 841 (doi:10.1016/j.ygcen.2014.03.040)  
48  
49 842 32. Mishra B, Sah N, Wasti S. 2019 Genetic and hormonal regulation of egg formation in  
50  
51 843 the oviduct of laying hens. In *Poultry*, pp. 5–6. London, UK: IntechOpen.  
52  
53 844 (doi:http://dx.doi.org/10.5772/intechopen.85011)  
54  
55  
56 845 33. Nakao N *et al.* 2007 Circadian clock gene regulation of steroidogenic acute regulatory  
57  
58 846 protein gene expression in preovulatory ovarian follicles. *Endocrinology* **148**, 3031–  
59  
60

- 1  
2  
3 847 3038. (doi:10.1210/en.2007-0044)  
4  
5 848 34. Fasnko GM, Robinson FE, Danforth BL, Zelter I. 2000 An examination of fertility,  
6 hatchability, embryo mortality, and chick weight in double versus single-yolked  
7 849 broiler breeder eggs. *Can. J. Anim. Sci.* **80**, 489–493. (doi:10.4141/A99-090)  
8 850  
9  
10 851 35. Salamon A, Kent J. 2014 Changes during incubation within double-yolked duck (*Anas*  
11 platyrhynchos domesticus) eggs: yolk position, mortality, hatchability and the  
12 852 importance of optimal egg size. *Int. J. Poult. Sci.* **13**, 6.  
13 853 (doi:10.3923/ijps.2014.695.702)  
14 854  
15 855 36. Křiženecký J, Sajner J, Vančíková RJ. 1958 A case of a hen yolk with seven  
16 856 blastodiscs. *Poult. Sci.* **37**, 512–514. (doi:10.3382/ps.0370512)  
17 857  
18 857 37. de Camargo C, Gibbs HL, Costa MC, Silveira LF, Rainho CA, Ribolla PEM, Wasko  
19 858 AP, Francisco MR. 2017 Triploidy in a sexually dimorphic passerine provides new  
20 859 evidence for the effect of the W chromosome on secondary sexual traits in birds. *J.*  
21 860 *Avian Biol.* **48**, 1475–1480. (doi:10.1111/jav.01504)  
22 861  
23 861 38. Ayers KL, Smith CA, Lambeth LS. 2013 The molecular genetics of avian sex  
24 862 determination and its manipulation. *Genesis* **51**, 325–336. (doi:10.1002/dvg.22382)  
25 863  
26 863 39. Forstmeier W, Ellegren H. 2010 Trisomy and triploidy are sources of embryo  
27 864 mortality in the zebra finch. *Proc. R. Soc. B Biol. Sci.* **277**, 2655–2660.  
28 865 (doi:10.1098/rspb.2010.0394)  
29 866  
30 866 40. Shinomiya A, Shimmura T, Nishiwaki-Ohkawa T, Yoshimura T. 2014 Regulation of  
31 867 seasonal reproduction by hypothalamic activation of thyroid hormone. *Front.*  
32 868 *Endocrinol. (Lausanne)*. **5**, 1–7. (doi:10.3389/fendo.2014.00012)  
33 869  
34 869 41. Sharp PJ, Follet BK. 1969 The effect of hypothalamic lesions on gonadotrophin  
35 870 release in Japanese quail (*Coturnix coturnix japonica*). *Neuroendocrinology* **5**, 205–  
36 871 218. (doi:10.1159/000121861)  
37  
38  
39  
40  
41  
42  
43  
44  
45  
46  
47  
48  
49  
50  
51  
52  
53  
54  
55  
56  
57  
58  
59  
60

- 1  
2  
3 872 42. Rae M. 1995 Endocrine disease in pet birds. *Semin. Avian Exot. Pet Med.* **4**, 32–38.  
4  
5 873 (doi:10.1016/S1055-937X(05)80007-6)  
6  
7  
8 874 43. Schmidt RE, Reavill DR. 2006 Endocrine lesions in psittacine birds. *Proc. Assoc.*  
9  
10 875 *Avian Veterans Conf. San Antonio* , 27–29.  
11  
12 876 44. Crosta L, Gerlach H, Bürkle M, Timossi L. 2003 Physiology, diagnosis, and diseases  
13  
14 877 of the avian reproductive tract. *Vet. Clin. North Am. Exot. Anim. Pract.* **6**, 57–83.  
15  
16 878 (doi:10.1016/S1094-9194)  
17  
18  
19 879 45. Crosta L, Gerlach H, Burkle M, Timossi L. 2002 Endoscopic testicular biopsy  
20  
21 880 technique in Psittaciformes. *J. Avian Med. Surg.* **16**, 106–110. (doi:10.1647/1082-  
22  
23 881 6742)  
24  
25  
26 882 46. Dietrich HM, Cole RK, Wick G. 1999 The natural history of the obese strain of  
27  
28 883 chickens - An animal model for spontaneous autoimmune thyroiditis. *Poult. Sci.* **78**,  
29  
30 884 1359–1371. (doi:10.1093/ps/78.10.1359)  
31  
32  
33 885 47. Gilbert AB, Davidson MF, Hardie MA, Wells JW. 1981 The induction of atresia in the  
34  
35 886 domestic fowl (*Gallus domesticus*) by ovine LH. *Gen. Comp. Endocrinol.* **44**, 344–  
36  
37 887 349. (doi:10.1016/0016-6480(81)90011-3)  
38  
39  
40 888 48. Soliman KFA, Huston TM. 1978 Inhibitory effect of serotonin on ovulation in the  
41  
42 889 domestic fowl, *Gallus domesticus*. *Anim. Reprod. Sci.* **1**, 69–73. (doi:10.1016/0378-  
43  
44 890 4320(78)90011-8)  
45  
46  
47 891 49. Lewis PD. 2004 Responses of domestic fowl to excess iodine: a review. *Br. J. Nutr.*  
48  
49 892 **91**, 29–39. (doi:10.1079/BJN20031017)  
50  
51  
52 893 50. Cowan ML, Martin GB, Monks DJ, Johnston SD, Doneley RJT, Blackberry MA. 2014  
53  
54 894 Inhibition of the reproductive system by deslorelin in male and female pigeons  
55  
56 895 (*Columba livia*). *J. Avian Med. Surg.* **28**, 102–108. (doi:10.1647/2013-027)  
57  
58  
59 896 51. Rangel PL, Sharp PJ, Gutierrez CG. 2006 Testosterone antagonist (flutamide) blocks  
60

- 1  
2  
3 897 ovulation and preovulatory surges of progesterone, luteinizing hormone and oestradiol  
4  
5 898 in laying hens. *Reproduction* **131**, 1109–1114. (doi:10.1530/rep.1.01067)  
6  
7  
8 899 52. Wang C, Li C, Li H, Ma W, Chen S, Zhao Y, Rao J, Zhou X. 2015 Downregulation of  
9  
10 900 the expression of inhibin  $\alpha$  subunit and betaglycan in porcine cystic follicles. *J. Vet.*  
11  
12 901 *Med. Sci.* **77**, 1419–1425. (doi:10.1292/jvms.14-0617)  
13  
14  
15 902 53. Christians JK, Williams TD. 2002 Effects of porcine follicle-stimulating hormone on  
16  
17 903 the reproductive performance of female zebra finches (*Taeniopygia guttata*). *Gen.*  
18  
19 904 *Comp. Endocrinol.* **125**, 121–131. (doi:10.1006/gcen.2001.7737)  
20  
21  
22 905 54. Behringer RR, Cate RL, Froelick GJ, Palmiter RD, Brinster RL. 1990 Abnormal  
23  
24 906 sexual development in transgenic mice chronically expressing Müllerian inhibiting  
25  
26 907 substance. *Nature* **345**, 167–170. (doi:10.1038/345167a0)  
27  
28  
29 908 55. Lambeth LS *et al.* 2016 Overexpression of anti-Müllerian hormone disrupts gonadal  
30  
31 909 sex differentiation, blocks sex hormone synthesis, and supports cell autonomous sex  
32  
33 910 development in the chicken. *Endocrinology* **157**, 1258–1275. (doi:10.1210/en.2015-  
34  
35 911 1571)  
36  
37  
38 912 56. Cutting AD, Ayers K, Davidson N, Oshlack A, Doran T, Sinclair AH, Tizard M, Smith  
39  
40 913 CA. 2014 Identification, expression, and regulation of anti-Müllerian hormone type-II  
41  
42 914 receptor in the embryonic chicken gonad. *Biol. Reprod.* **90**, 1–12.  
43  
44 915 (doi:10.1095/biolreprod.113.116491)  
45  
46  
47 916 57. Lemcke RA, Stephens CS, Hildebrandt KA, Johnson PA. 2018 Anti-Müllerian  
48  
49 917 hormone type II receptor in avian follicle development. *Biol. Reprod.* **99**, 1227–1234.  
50  
51 918 (doi:10.1093/biolre/i0y140)  
52  
53  
54 919 58. Ottinger MA, Abdelnabi M, Quinn M, Golden N, Wu J, Thompson N. 2002  
55  
56 920 Reproductive consequences of EDCs in birds. *Neurotoxicol. Teratol.* **24**, 17–28.  
57  
58 921 (doi:10.1016/S0892-0362(01)00195-7)  
59  
60



- 1  
2  
3 922 59. Borgeest C, Greenfield C, Tomic D, Flaws JA. 2002 The effects of endocrine  
4  
5 923 disrupting chemicals on the ovary. *Front. Biosci.* **7**, 1941–1948. (doi:10.1046/j.1537-  
6  
7 924 2995.2003.00402.x)
- 8  
9  
10 925 60. Patisaul HB, Fenton SE, Aylor D. 2018 Animal models of endocrine disruption. *Best*  
11  
12 926 *Pract. Res. Clin. Endocrinol. Metab.* **32**, 283–297. (doi:10.1016/j.beem.2018.03.011)
- 13  
14 927 61. Crews D, Willingham E, Skipper JK. 2000 Endocrine disruptors: Present issues, future  
15  
16 928 directions. *Q. Rev. Biol.* **75**, 243–260. (doi:10.1086/393498)
- 17  
18 929 62. Ainley DG, Grau CR, Roudybush TE, Morrell SH, Utts JM. 1981 Petroleum ingestion  
19  
20 930 reduces reproduction in Cassin’s Auklets. *Mar. Pollut. Bull.* **12**, 314–317.  
21  
22 931 (doi:10.1016/0025-326X(81)90083-7)
- 23  
24  
25 932 63. Fry DM. 1995 Reproductive effects in birds exposed to pesticides and industrial  
26  
27 933 chemicals. *Environ. Health Perspect.* **103**, 165–171.
- 28  
29 934 64. Fernie KJ, Shutt JL, Letcher RJ, Ritchie IJ, Bird DM. 2009 Environmentally relevant  
30  
31 935 concentrations of DE-71 and HBCD alter eggshell thickness and reproductive success  
32  
33 936 of American kestrels. *Environ. Sci. Technol.* **43**, 2124–2130. (doi:10.1021/es8027346)
- 34  
35  
36 937 65. Rahman MS, Sasanami T, Mori M. 2007 Effects of cadmium administration on  
37  
38 938 reproductive performance of Japanese quail (*Coturnix japonica*). *J. Poult. Sci.* **44**, 92–  
39  
40 939 97. (doi:10.2141/jpsa.44.92)
- 41  
42  
43 940 66. Gasparik J, Venglarcik J, Slamecka J, Kropil R, Smehyl P, Kopecky J. 2012  
44  
45 941 Distribution of lead in selected organs and its effect on reproduction parameters of  
46  
47 942 pheasants (*Phasianus colchicus*) after an experimental per oral administration. *J.*  
48  
49 943 *Environ. Sci. Heal. Part A* **47**, 1267–1271. (doi:10.1080/10934529.2012.672127)
- 50  
51  
52 944 67. He Y, Wang L, Li X, Zhao H. 2020 The effects of chronic lead exposure on the  
53  
54 945 ovaries of female juvenile Japanese quails (*Coturnix japonica*): Developmental delay,  
55  
56 946 histopathological alterations, hormone release disruption and gene expression disorder.  
57  
58  
59  
60

- 1  
2  
3 947 *Ecotoxicol. Environ. Saf.* **205**, 111338. (doi:10.1016/j.ecoenv.2020.111338)  
4  
5 948 68. Yuan C, Song HH, Jiang YJ, Azzam MMM, Zhu S, Zou XT. 2013 Effects of lead  
6  
7 949 contamination in feed on laying performance, lead retention of organs and eggs,  
8  
9 950 protein metabolism, and hormone levels of laying hens. *J. Appl. Poult. Res.* **22**, 878–  
10  
11 951 884. (doi:10.3382/japr.2013-00801)  
12  
13 952 69. Varian-Ramos CW, Swaddle JP, Cristol DA. 2014 Mercury reduces avian  
14  
15 953 reproductive success and imposes selection: An experimental study with adult- or  
16  
17 954 lifetime-exposure in zebra finch. *PLoS One* **9**, e95674.  
18  
19 955 (doi:10.1371/journal.pone.0095674)  
20  
21 956 70. Zala SM, Penn DJ. 2004 Abnormal behaviours induced by chemical pollution: a  
22  
23 957 review of the evidence and new challenges. *Anim. Behav.* **68**, 649–664.  
24  
25 958 (doi:10.1016/j.anbehav.2004.01.005)  
26  
27 959 71. Giesy JP, Feyk LA, Jones PD, Kannan K, Sanderson T. 2003 Review of the effects of  
28  
29 960 endocrine-disrupting chemicals in birds. *Pure Appl. Chem.* **75**, 2287–2303.  
30  
31 961 (doi:10.1351/pac200375112287)  
32  
33 962 72. Fidler AE, Zwart S, Pharis RP, Weston RJ, Lawrence SB, Jansen P, Elliott G, Merton  
34  
35 963 D V. 2000 Screening the foods of an endangered parrot, the kakapo (*Strigops*  
36  
37 964 *habroptilus*), for oestrogenic activity using a recombinant yeast bioassay. *Reprod.*  
38  
39 965 *Fertil. Dev.* **41**, 2. (doi:10.1071/RD00041)  
40  
41 966 73. Bernanke J, Köhler H-R. 2009 The impact of environmental chemicals on wildlife  
42  
43 967 vertebrates. *Rev. Environ. Contam. Toxicol.* **198**, 1–47. (doi:10.1007/978-0-387-  
44  
45 968 09647-6\_1)  
46  
47 969 74. Ottinger MA, Bohannon M, Carpenter L, Carro T, Rochester JR, Dean K. 2014  
48  
49 970 Actions of toxicants and endocrine-disrupting chemicals in birds. In *Sturkie's Avian*  
50  
51 971 *Physiology* (ed CG Scanes), pp. 979–1001. Elsevier Science & Technology.  
52  
53  
54  
55  
56  
57  
58  
59  
60

- 1  
2  
3 972 75. Ottinger MA, Abdelnabi MA, Henry P, McGary S, Thompson N, Wu JM. 2001  
4  
5 973 Neuroendocrine and behavioral implications of endocrine disrupting chemicals in  
6  
7 974 quail. *Horm. Behav.* **40**, 234–247. (doi:10.1006/hbeh.2001.1695)  
8  
9  
10 975 76. Ottinger MA, Quinn MJ, Lavoie E, Abdelnabi MA, Thompson N, Hazelton JL, Wu  
11  
12 976 JM, Beavers J, Jaber M. 2005 Consequences of endocrine disrupting chemicals on  
13  
14 977 reproductive endocrine function in birds: Establishing reliable end points of exposure.  
15  
16 978 *Domest. Anim. Endocrinol.* **29**, 411–419. (doi:10.1016/j.domaniend.2005.02.038)  
17  
18  
19 979 77. Ottinger MA, Dean KM. 2011 Neuroendocrine impacts of endocrine-disrupting  
20  
21 980 chemicals in birds: Life stage and species sensitivities. *J. Toxicol. Environ. Heal. -*  
22  
23 981 *Part B Crit. Rev.* **14**, 413–422. (doi:10.1080/10937404.2011.578560)  
24  
25  
26 982 78. Fairley DH, Taylor A. 2003 Anovulation. *Br. Med. J.* **327**, 546–549.  
27  
28 983 (doi:10.1136/bmj.327.7414.546)  
29  
30  
31 984 79. Srinivasan P, Balasubramaniam GA, Gopala Krishna Murthy TR, Balachandran P.  
32  
33 985 2014 Prevalence and pathology of oviduct impaction in commercial white leghorn  
34  
35 986 layer chicken in Namakkal region of India. *Vet. World* **7**, 553–558.  
36  
37 987 (doi:10.14202/vetworld.2014.553-558)  
38  
39  
40 988 80. Rosen LB. 2012 Avian reproductive disorders. *J. Exot. Pet Med.* **21**, 124–131.  
41  
42 989 (doi:10.1053/j.jepm.2012.02.013)  
43  
44  
45 990 81. Apperson K, Bird K, Cherian G, Löhr C. 2017 Histology of the ovary of the laying hen  
46  
47 991 (*Gallus domesticus*). *Vet. Sci.* **4**, 66. (doi:10.3390/vetsci4040066)  
48  
49  
50 992 82. Murdoch WJ, Van Kirk EA, Alexander BM. 2005 DNA damages in ovarian surface  
51  
52 993 epithelial cells of ovulatory hens. *Exp. Biol. Med.* **230**, 429–433.  
53  
54 994 (doi:10.1177/15353702-0323006-11)  
55  
56  
57 995 83. Barnes MN, Berry WD, Straughn JM, Kirby TO, Leath CA, Huh WK, Grizzle WE,  
58  
59 996 Partridge EE. 2002 A pilot study of ovarian cancer chemoprevention using  
60

- 1  
2  
3 997 medroxyprogesterone acetate in an avian model of spontaneous ovarian  
4  
5 998 carcinogenesis. *Gynecol. Oncol.* **87**, 57–63. (doi:10.1006/gyno.2002.6806)  
6  
7  
8 999 84. Rodriguez GC *et al.* 2002 Progesterin-induced apoptosis in the Macaque ovarian  
9  
10 1000 epithelium : Differential regulation of transforming growth factor-  $\beta$ . *J. Natl. Cancer*  
11  
12 1001 *ilstitute* **94**, 50–60. (doi:10.1093/jnci/94.1.50)  
13  
14  
15 1002 85. Zhao Q *et al.* 2017 Decreased egg production in laying hens associated with infection  
16  
17 1003 with genotype 3 avian hepatitis E virus strain from China. *Vet. Microbiol.* **203**, 174–  
18  
19 1004 180. (doi:10.1016/j.vetmic.2017.03.005)  
20  
21  
22 1005 86. Bonfante F *et al.* 2018 A G1-lineage H9N2 virus with oviduct tropism causes chronic  
23  
24 1006 pathological changes in the infundibulum and a long-lasting drop in egg production.  
25  
26 1007 *Vet. Res.* **49**, 83. (doi:10.1186/s13567-018-0575-1)  
27  
28  
29 1008 87. Crinion RAP, Ball RA, Hofstad MS. 1971 Pathogenesis of oviduct lesions in immature  
30  
31 1009 chickens following exposure to infectious bronchitis virus at one day old. *Avian Dis.*  
32  
33 1010 **15**, 32–41.  
34  
35  
36 1011 88. Srinivasan P, Balasubramaniam GA, Murthy TRGK, Balachandran P. 2013  
37  
38 1012 Bacteriological and pathological studies of egg peritonitis in commercial layer chicken  
39  
40 1013 in Namakkal area. *Asian Pac. J. Trop. Biomed.* **3**, 988–994. (doi:10.1016/S2221-  
41  
42 1014 1691(13)60191-4)  
43  
44  
45 1015 89. Yoshimura Y. 2015 Avian  $\beta$ -defensins expression for the innate immune system in hen  
46  
47 1016 reproductive organs. *Poult. Sci.* **94**, 804–809. (doi:10.3382/ps/peu021)  
48  
49  
50 1017 90. Woods DC, Schorey JS, Johnson AL. 2009 Toll-like receptor signaling in hen ovarian  
51  
52 1018 granulosa cells is dependent on stage of follicle maturation. *Reproduction* **137**, 987–  
53  
54 1019 996. (doi:10.1530/REP-08-0320)  
55  
56  
57 1020 91. Yoshimura Y. 2004 Significance of local immunity in hen reproductive organs. *Anim.*  
58  
59 1021 *Sci.* **75**, 183–191. (doi:10.1111/j.1740-0929.2004.00174.x)  
60

- 1  
2  
3 1022 92. Mande P V., Parikh FR, Hinduja I, Zaveri K, Vaidya R, Gajbhiye R, Khole V V. 2011  
4  
5 1023 Identification and validation of candidate biomarkers involved in human ovarian  
6  
7 1024 autoimmunity. *Reprod. Biomed. Online* **23**, 471–483.  
8  
9 (doi:10.1016/j.rbmo.2011.06.013)  
10 1025  
11  
12 1026 93. Barua A, Yoshimura Y. 2001 Ovarian autoimmunity in relations to egg production in  
13  
14 1027 laying hens. *Reproduction* **1**, 117–122.  
15  
16 1028 94. Barua A, Yoshimura Y, Tamura T. 1998 Effects of ageing and oestrogen on the  
17  
18 1029 localization of immunoglobulin-containing cells in the chicken ovary. *J. Reprod.*  
19  
20 1030 *Fertil.* **114**, 11–16. (doi:10.1530/jrf.0.1140011)  
21  
22 1031 95. Ellison PT, Ottinger MA. 2014 A comparative perspective on reproductive aging,  
23  
24 1032 reproductive cessation, post reproductive life, and social behaviour. In *Sociality,*  
25  
26 1033 *Hierarchy, Health: Comparative Biodemography: A collection of papers* (eds M  
27  
28 1034 Weinstein, MA Lane), pp. 315–338. The National Academic Press.  
29  
30 1035 96. Briere S, Brillard JP, Panheleux M, Froment P. 2011 Diet, welfare and male and  
31  
32 1036 female bird fertility: The complex relationship. *Prod. Anim.* **24**, 171–180.  
33  
34 (doi:10.20870/productions-animales.2011.24.2.3251)  
35 1037  
36 1038 97. Eitan Y, Soller M. 2009 Problems associated with broiler breeder entry into lay: A  
37  
38 1039 review and hypothesis. *Worlds. Poult. Sci. J.* **65**, 641–648.  
39  
40 1040 (doi:10.1017/S0043933909000452)  
41  
42 1041 98. Richards MP, Poch SM, Coon CN, Rosebrough RW, Ashwell CM, McMurtry JP.  
43  
44 1042 2003 Feed restriction significantly alters lipogenic gene expression in broiler breeder  
45  
46 1043 chickens. *J. Nutr.* **133**, 707–715. (doi:10.1093/jn/133.3.707)  
47  
48 1044 99. Chen SE, McMurtry JP, Walzem RL. 2006 Overfeeding-induced ovarian dysfunction  
49  
50 1045 in broiler breeder hens is associated with lipotoxicity. *Poult. Sci.* **85**, 70–81.  
51  
52 1046 (doi:10.1093/ps/85.1.70)  
53  
54  
55  
56  
57  
58  
59  
60

- 1  
2  
3 1047 100. De Jong IC, Guémené D. 2011 Major welfare issues in broiler breeders. *Worlds. Poult.*  
4  
5 1048 *Sci. J.* **67**, 73–82. (doi:10.1017/S0043933911000067)  
6  
7 1049 101. Jamieson IG. 2004 No evidence that dietary nutrient deficiency is related to poor  
8  
9 reproductive success of translocated takahe. *Biol. Conserv.* **115**, 165–170.  
10  
11 1050  
12 1051 (doi:10.1016/S0006-3207(03)00216-7)  
13  
14 1052 102. Attia YA, Abdalah AA, Zeweil HS, Bovera F, El-Din AA, Araft MA. 2010 Effect of  
15  
16 inorganic or organic selenium supplementation on productive performance, egg quality  
17 1053 and some physiological traits of dual-purpose breeding hens. *Czech J. Anim. Sci.* **55**,  
18  
19 1054 505–519. (doi:10.17221/1702-CJAS)  
20  
21 1055  
22 1056 103. Whitehead CC, Shannon DW. 1974 The control of egg production using a low-sodium  
23  
24 1057 diet. *Br. Poult. Sci.* **15**, 429–434. (doi:10.1080/00071667408416130)  
25  
26 1058 104. Yaripour M, Seidavi A, Dadashbeiki M, Laudadio V, Tufarelli V, Ragni M, Payan-  
27  
28 1059 Carreira R. 2018 Impact of dietary supra-nutritional levels of vitamins A and E on  
29  
30 fertility traits of broiler breeder hens in late production phase. *Agriculture* **8**, 149.  
31  
32 1060  
33 1061 (doi:10.3390/agriculture8100149)  
34  
35 1062 105. Miao LP, Li LL, Zhu MK, Dong XY, Elwan HAM, Zou XT. 2019 Excess dietary  
36  
37 1063 fluoride affects laying performance , egg quality , tissue retention , serum biochemical  
38  
39 1064 indices , and reproductive hormones of laying hens. *Poult. Sci.* **98**, 6873–6879.  
40  
41 1065 (doi:10.3382/ps/pez443)  
42  
43 1066 106. Barnett J, Hemsworth P, Newman E. 1992 Fear of humans and its relationship with  
44  
45 1067 productivity in laying hens at commercial farms. *Br. Poult. Sci.* **33**, 699–710.  
46  
47 1068 (doi:10.1080/00071669208417510)  
48  
49 1069 107. Jones B. 1996 Fear and adaptability in poultry: insights, implications and imperatives.  
50  
51 1070 *Worlds. Poult. Sci. J.* **52**, 131–174. (doi:10.1079/WPS19960013)  
52  
53 1071 108. Adams A, Craig J. 1985 Effect of crowding and cage shape on productivity and  
54  
55  
56  
57  
58  
59  
60

- 1  
2  
3 1072           profitability of caged layers: A survey. *Poult. Sci.* **64**, 238–242.  
4  
5 1073           (doi:10.3382/ps.0640238)  
6  
7  
8 1074   109.   Lara L, Rostagno M. 2013 Impact of heat stress on poultry production. *Animals* **3**,  
9  
10 1075           356–369. (doi:10.3390/ani3020356)  
11  
12 1076   110.   Nardone A, Ronchi B, Lacetera N, Ranieri MS, Bernabucci U. 2010 Effects of climate  
13  
14 1077           changes on animal production and sustainability of livestock systems. *Livest. Sci.* **130**,  
15  
16 1078           57–69. (doi:10.1016/j.livsci.2010.02.011)  
17  
18  
19 1079   111.   Deng W, Dong XF, Tong JM, Zhang Q. 2012 The probiotic *Bacillus licheniformis*  
20  
21 1080           ameliorates heat stress-induced impairment of egg production, gut morphology, and  
22  
23 1081           intestinal mucosal immunity in laying hens. *Poult. Sci.* **91**, 575–582.  
24  
25 1082           (doi:10.3382/ps.2010-01293)  
26  
27  
28 1083   112.   Mack LA, Felver-Gant JN, Dennis RL, Cheng HW. 2013 Genetic variations alter  
29  
30 1084           production and behavioral responses following heat stress in 2 strains of laying hens.  
31  
32 1085           *Poult. Sci.* **92**, 285–294. (doi:10.3382/ps.2012-02589)  
33  
34  
35 1086   113.   Walsh BS, Parratt SR, Hoffmann AA, Atkinson D, Snook RR, Bretman A, Price TAR.  
36  
37 1087           2019 The impact of climate change on fertility. *Trends Ecol. Evol.* **34**, 249–259.  
38  
39 1088           (doi:10.1016/j.tree.2018.12.002)  
40  
41  
42 1089   114.   Hurley LL, McDiarmid CS, Friesen CR, Griffith SC, Rowe M. 2018 Experimental  
43  
44 1090           heatwaves negatively impact sperm quality in the zebra finch. *Proc. R. Soc. B Biol.*  
45  
46 1091           *Sci.* **285**. (doi:10.1098/rspb.2017.2547)  
47  
48  
49 1092   115.   Reed TE, Kruuk LEB, Wanless S, Frederiksen M, Cunningham EJA, Harris MP. 2008  
50  
51 1093           Reproductive senescence in a long-lived seabird: Rates of decline in late-life  
52  
53 1094           performance are associated with varying costs of early reproduction. *Am. Nat.* **171**,  
54  
55 1095           E89–E101. (doi:10.1086/524957)  
56  
57  
58 1096   116.   Balbontin J, Møller AP. 2015 Environmental conditions during early life accelerate the  
59  
60

- 1  
2  
3 1097 rate of senescence in a short-lived passerine bird. *Ecology* **96**, 948–959.  
4  
5 1098 (doi:10.1890/14-1274.1)  
6  
7  
8 1099 117. Spagopoulou F, Teplitsky C, Lind MI, Chantepie S, Gustafsson L, Maklakov AA.  
9  
10 1100 2020 Silver-spoon upbringing improves early-life fitness but promotes reproductive  
11  
12 1101 ageing in a wild bird. *Ecol. Lett.* **23**, 994–1002. (doi:10.1111/ele.13501)  
13  
14 1102 118. Holmes DJ, Thomson SL, Wu J, Ottinger MA. 2003 Reproductive aging in female  
15  
16 1103 birds. *Exp. Gerontol.* **38**, 751–756. (doi:10.1016/S0531-5565(03)00103-7)  
17  
18 1104 119. Finch CE, Holmes DJ. 2010 Ovarian aging in developmental and evolutionary  
19  
20 1105 contexts. In *Reproductive Aging* (ed K Weinstein, M and OConnor), pp. 82–94.  
21  
22 1106 (doi:10.1111/j.1749-6632.2010.05610.x)  
23  
24 1107 120. Hemmings N, Birkhead TR. 2015 Polyspermy in birds: sperm numbers and embryo  
25  
26 1108 survival. *Proc. R. Soc. B Biol. Sci.* **282**, 20151682. (doi:10.1098/rspb.2015.1682)  
27  
28 1109 121. Sasanami T, Matsuzaki M, Mizushima S, Hiyama G. 2013 Sperm storage in the female  
29  
30 1110 reproductive tract in birds. *J. Reprod. Dev.* **59**, 334–338. (doi:10.1146/annurev-animal-  
31  
32 1111 021815-111350)  
33  
34 1112 122. Khillare GS, Sastry KVH, Agrawal R, Prakash A, Mohan J, Singh RP. 2018 Molecular  
35  
36 1113 and biochemical events in sperm storage tubules of oviduct in birds. *Worlds. Poult.*  
37  
38 1114 *Sci. J.* **74**, 35–44. (doi:10.1017/S004393391700085X)  
39  
40 1115 123. Roberts V. 2006 Breeding and egg production. *Natl. Anim. Dis. Inf. Serv.* , Part 6. See  
41  
42 1116 [http://www.nadis.org.uk/disease-a-z/poultry/diseases-of-farmyard-poultry/part-6-](http://www.nadis.org.uk/disease-a-z/poultry/diseases-of-farmyard-poultry/part-6-breeding-and-egg-production/)  
43  
44 1117 [breeding-and-egg-production/](http://www.nadis.org.uk/disease-a-z/poultry/diseases-of-farmyard-poultry/part-6-breeding-and-egg-production/) (accessed on 31 January 2020).  
45  
46 1118 124. Török J, Michl G, Garamszegi LZ, Barna J. 2003 Repeated inseminations required for  
47  
48 1119 natural fertility in a wild bird population. *Proc. R. Soc. B Biol. Sci.* **270**, 641–647.  
49  
50 1120 (doi:10.1098/rspb.2002.2257)  
51  
52 1121 125. Hunter FM, Petrie M, Otronen M, Birkhead T, Pape Møller A. 1993 Why do females  
53  
54  
55  
56  
57  
58  
59  
60



- 1  
2  
3 1122 copulate repeatedly with one male? *Trends Ecol. Evol.* **8**, 21–26. (doi:10.1016/0169-  
4  
5 1123 5347(93)90126-A)  
6  
7  
8 1124 126. Westneat DF, Rambo TB. 2000 Copulation exposes female Red-winged Blackbirds to  
9  
10 1125 bacteria in male semen. *J. AVIAN Biol.* **31**, 1–7. (doi:10.1034/j.1600-  
11  
12 1126 048X.2000.310101.x)  
13  
14  
15 1127 127. White J, Mirleau P, Danchin E, Mulard H, Hatch SA, Heeb P, Wagner RH. 2010  
16  
17 1128 Sexually transmitted bacteria affect female cloacal assemblages in a wild bird. *Ecol.*  
18  
19 1129 *Lett.* **13**, 1515–1524. (doi:10.1111/j.1461-0248.2010.01542.x)  
20  
21 1130 128. Brillard JP. 2003 Practical aspects of fertility in poultry. *Worlds. Poult. Sci. J.* **59**, 441–  
22  
23 1131 446. (doi:10.3184/175815509X431803)  
24  
25  
26 1132 129. Breque C, Surai P, Brillard JP. 2003 Roles of antioxidants on prolonged storage of  
27  
28 1133 avian spermatozoa in vivo and in vitro. *Mol. Reprod. Dev.* **66**, 314–323.  
29  
30 1134 (doi:10.1002/mrd.10347)  
31  
32  
33 1135 130. Bakst MR. 2011 Role of the oviduct in maintaining sustained fertility in hens. *J. Anim.*  
34  
35 1136 *Sci.* **89**, 1323–1329. (doi:10.2527/jas.2010-3663)  
36  
37  
38 1137 131. Birkhead TR, Biggins JD. 1998 Sperm competition mechanisms in birds: Models and  
39  
40 1138 data. *Behav. Ecol.* **9**, 253–260. (doi:10.1093/beheco/9.3.253)  
41  
42  
43 1139 132. Birkhead TR. 1992 Sperm storage and the fertile period in the Bengalese finch. *Auk*  
44  
45 1140 **109**, 620–625.  
46  
47 1141 133. Birkhead TR, Brillard JP. 2007 Reproductive isolation in birds: postcopulatory  
48  
49 1142 prezygotic barriers. *Trends Ecol. Evol.* **22**, 266–272. (doi:10.1016/j.tree.2007.02.004)  
50  
51  
52 1143 134. Pizzari T, Birkhead TR. 2000 Female feral fowl eject sperm of subdominant males.  
53  
54 1144 *Nature* **405**, 787–789. (doi:10.1038/35015558)  
55  
56 1145 135. Møller AP, Mousseau TA, Rudolfsen G. 2008 Females affect sperm swimming  
57  
58 1146 performance: A field experiment with barn swallows *Hirundo rustica*. *Behav. Ecol.* **19**,  
59  
60

- 1  
2  
3 1147 1343–1350. (doi:10.1093/beheco/arn068)  
4  
5 1148 136. Huang A, Isobe N, Yoshimura Y. 2017 Changes in localization and density of CD63-  
6  
7  
8 1149 positive exosome-like substances in the hen oviduct with artificial insemination and  
9  
10 1150 their effect on sperm viability. *Theriogenology* **101**, 135–143.  
11  
12 1151 (doi:10.1016/j.theriogenology.2017.06.028)  
13  
14 1152 137. Yoshimura Y, Okamoto T, Tamura T. 1997 Localisation of MHC class II,  
15  
16  
17 1153 lymphocytes and immunoglobulins in the oviduct of laying and moulting hens. *Br.*  
18  
19 1154 *Poult. Sci.* **38**, 590–596. (doi:10.1080/00071669708418041)  
20  
21 1155 138. Van Krey HP, Schupp GT, Denbow DM, Hulet RM. 1987 Turkey breeder hen  
22  
23  
24 1156 infertility associated with plasma cells in the uterovaginal sperm storage glands.  
25  
26 1157 *Theriogenology* **27**, 913–921. (doi:10.1016/0093-691X(87)90213-5)  
27  
28 1158 139. Higaki K, Yoshimura Y, Tamura TO. 1995 Localization of spermatozoa and  
29  
30  
31 1159 leukocytes in vagina and utero vaginal junction after copulation in Japanese quail  
32  
33 1160 (*Coturnix coturnix japonica*). *Japanese Poult. Sci.* **32**, 387–393.  
34  
35 1161 (doi:10.2141/jpsa.32.387)  
36  
37 1162 140. Zeh JA, Zeh DW. 1997 The evolution of polyandry II: Post-copulatory defences  
38  
39  
40 1163 against genetic incompatibility. *Proc. R. Soc. B Biol. Sci.* **264**, 69–75.  
41  
42 1164 (doi:10.1098/rspb.1997.0010)  
43  
44 1165 141. Løvlie H, Gillingham MAF, Worley K, Pizzari T, Richardson DS. 2013 Cryptic  
45  
46  
47 1166 female choice favours sperm from major histocompatibility complex-dissimilar males.  
48  
49 1167 *Proc. R. Soc. B Biol. Sci.* **280**, 20131296. (doi:10.1098/rspb.2013.1296)  
50  
51 1168 142. Hasson O, Stone L. 2009 Male infertility, female fertility and extrapair copulations.  
52  
53  
54 1169 *Biol. Rev.* **84**, 225–244. (doi:10.1111/j.1469-185X.2008.00068.x)  
55  
56 1170 143. Santos TC, Murakami AE, Oliveira CAL, Giraldelelli N. 2013 Sperm-egg interaction  
57  
58 1171 and fertility of japanese breeder quails from 10 to 61 weeks. *Poult. Sci.* **92**, 205–210.  
59  
60

- 1  
2  
3 1172 (doi:10.3382/ps.2012-02536)  
4  
5  
6 1173 144. Brillard JP, Bakst MR. 1990 Quantification of spermatozoa in the sperm-storage  
7  
8 1174 tubules of turkey hens and the relation to sperm numbers in the perivitelline layer of  
9  
10 1175 eggs. *Biol. Reprod.* **43**, 271–275. (doi:10.1095/biolreprod43.2.271)  
11  
12 1176 145. Hemmings N, Birkhead TR, Brillard JP, Froment P, Briere S. 2015 Timing associated  
13  
14 1177 with oviductal sperm storage and release after artificial insemination in domestic hens.  
15  
16 1178 *Theriogenology* **83**, 1174–1178. (doi:10.1016/j.theriogenology.2014.12.022)  
17  
18 1179 146. Holm L, Ekwall H, Wishart GJ, Ridderstråle Y, Ridderstrale Y. 2000 Localization of  
19  
20 1180 calcium and zinc in the sperm storage tubules of chicken, quail and turkey using X-ray  
21  
22 1181 microanalysis. *J. Reprod. Fertil.* **118**, 331–336. (doi:10.1530/reprod/118.2.331)  
23  
24 1182 147. Matsuzaki M, Mizushima S, Hiyama G, Hirohashi N, Shiba K. 2015 Lactic acid is a  
25  
26 1183 sperm motility inactivation factor in the sperm storage tubules. *Sci. Rep.* **5**, 1–12.  
27  
28 1184 (doi:10.1038/srep17643)  
29  
30 1185 148. Huang A, Isobe N, Obitsu T, Yoshimura Y. 2016 Expression of lipases and lipid  
31  
32 1186 receptors in sperm storage tubules and possible role of fatty acids in sperm survival in  
33  
34 1187 the hen oviduct. *Theriogenology* **85**, 1334–1342.  
35  
36 1188 (doi:10.1016/j.theriogenology.2015.12.020)  
37  
38 1189 149. Bakst MR, Bauchan G. 2015 Apical blebs on sperm storage tubule epithelial cell  
39  
40 1190 microvilli: Their release and interaction with resident sperm in the turkey hen oviduct.  
41  
42 1191 *Theriogenology* **83**, 1438–1444. (doi:10.1016/j.theriogenology.2015.01.016)  
43  
44 1192 150. Das S, Nagasaka N, Yoshimura Y. 2005 Effects of repeated artificial insemination on  
45  
46 1193 the structure and function of oviducal sperm storage tubules in hens. *J. Poult. Sci.* **42**,  
47  
48 1194 39–47.  
49  
50 1195 151. Das SC, Isobe N, Yoshimura Y. 2008 Mechanism of prolonged sperm storage and  
51  
52 1196 sperm survivability in hen oviduct: A review. *Am. J. Reprod. Immunol.* **60**, 477–481.  
53  
54  
55  
56  
57  
58  
59  
60

- 1  
2  
3 1197 (doi:10.1111/j.1600-0897.2008.00651.x)  
4  
5 1198 152. Das SC, Nagasaka N, Yoshimura Y. 2006 Changes in the expression of estrogen  
6  
7 1199 receptor mRNA in the utero-vaginal junction containing sperm storage tubules in  
8  
9 1200 laying hens after repeated artificial insemination. *Theriogenology* **65**, 893–900.  
10  
11 1201 (doi:10.1016/j.theriogenology.2005.07.004)  
12  
13 1202 153. Ciccone NA, Sharp PJ, Wilson PW, Dunn IC. 2005 Changes in reproductive  
14  
15 1203 neuroendocrine mRNAs with decreasing ovarian function in ageing hens. *Gen. Comp.*  
16  
17 1204 *Endocrinol.* **144**, 20–27. (doi:10.1016/j.ygcen.2005.04.009)  
18  
19 1205 154. Mendonca T, Cadby AJ, Hemmings N. 2019 Sperm gatekeeping: 3D imaging reveals a  
20  
21 1206 constricted entrance to zebra finch sperm storage tubules. *Biophys. J.* **117**, 2180–2187.  
22  
23 1207 (doi:10.1101/451484)  
24  
25 1208 155. Ito T, Yoshizaki N, Tokumoto T, Ono H, Yoshimura T, Tsukada A, Kansaku N,  
26  
27 1209 Sasanami T. 2011 Progesterone is as sperm-releasing factor from the sperm-storage  
28  
29 1210 tubules in birds. *Endocrinology* **152**, 3952–3962. (doi:10.1210/en.2011-0237)  
30  
31 1211 156. Hiyama G, Matsuzaki M, Mizushima S, Dohra H, Ikegami K, Yoshimura T, Shiba K,  
32  
33 1212 Inaba K, Sasanami T. 2014 Sperm activation by heat shock protein 70 supports the  
34  
35 1213 migration of sperm released from sperm storage tubules in Japanese quail (*Coturnix*  
36  
37 1214 *japonica*). *Reproduction* **147**, 167–178. (doi:10.1530/REP-13-0439)  
38  
39 1215 157. Rozenboim I, Tako E, Gal-Garber O, Proudman JA, Uni Z. 2007 The effect of heat  
40  
41 1216 stress on ovarian function of laying hens. *Poult. Sci.* **86**, 1760–1765.  
42  
43 1217 (doi:10.1093/ps/86.8.1760)  
44  
45 1218 158. Allen T, Grigg G. 1957 Sperm transport in the fowl. *Aust. J. Agric. Res.* **8**, 788–789.  
46  
47 1219 (doi:10.1071/AR9570788)  
48  
49 1220 159. Bakst MR, Donoghue AM, Yoho DE, Moyle JR, Whipple SM, Camp MJ, Liu GQ,  
50  
51 1221 Bramwell RK. 2010 Comparisons of sperm storage tubule distribution and number in 4  
52  
53  
54  
55  
56  
57  
58  
59  
60

- 1  
2  
3 1222 strains of mature broiler breeders and in turkey hens before and after the onset of  
4  
5 1223 photostimulation. *Poult. Sci.* **89**, 986–992. (doi:10.3382/ps.2009-00481)  
6  
7  
8 1224 160. Spargo SC, Hope RM. 2003 Evolution and nomenclature of the zona pellucida gene  
9  
10 1225 family. *Biol. Reprod.* **68**, 358–362. (doi:10.1095/biolreprod.102.008086)  
11  
12 1226 161. Nishio S, Kohno Y, Iwata Y, Arai M, Okumura H, Oshima K, Nadano D, Matsuda T.  
13  
14 1227 2014 Glycosylated chicken ZP2 accumulates in the egg coat of immature oocytes and  
15  
16 1228 remains localized to the germinal disc region of mature eggs. *Biol. Reprod.* **91**, 1–10.  
17  
18 1229 (doi:10.1095/biolreprod.114.119826)  
19  
20  
21 1230 162. Springate L, Frasier TR. 2017 Gamete compatibility genes in mammals: candidates,  
22  
23 1231 applications and a potential path forward. *R. Soc. Open Sci.* **4**, 170577.  
24  
25 1232 (doi:10.1098/rsos.170577)  
26  
27  
28 1233 163. Noda T, Lu Y, Fujihara Y, Oura S, Koyano T, Kobayashi S, Matzuk MM, Ikawa M.  
29  
30 1234 2020 Sperm proteins SOF1, TMEM95, and SPACA6 are required for sperm-oocyte  
31  
32 1235 fusion in mice. *Proc. Natl. Acad. Sci. U. S. A.* **117**, 11493–11502.  
33  
34 1236 (doi:10.1073/pnas.1922650117)  
35  
36  
37 1237 164. Miyado K *et al.* 2000 Requirement of CD9 on the egg plasma membrane for  
38  
39 1238 fertilization. *Science (80-. )*. **287**, 321–324. (doi:10.1126/science.287.5451.321)  
40  
41  
42 1239 165. Naokazu I, Masaru O. 2005 The immunoglobulin superfamily protein izumo is  
43  
44 1240 required for sperm to fuse with eggs. *Nature* **434**, 234–238. (doi:10.1038/nature03362)  
45  
46  
47 1241 166. Bianchi E, Doe B, Goulding D, Wright GJ. 2014 Juno is the egg Izumo receptor and is  
48  
49 1242 essential for mammalian fertilization. *Nature* **508**, 483–487.  
50  
51 1243 (doi:10.1038/nature13203)  
52  
53  
54 1244 167. Grayson P. 2015 Izumo1 and Juno: The evolutionary origins and coevolution of  
55  
56 1245 essential sperm–egg binding partners. *R. Soc. Open Sci.* **2**, 150296.  
57  
58 1246 (doi:10.1098/rsos.150296)  
59  
60

- 1  
2  
3 1247 168. Trebichalská Z, Holubcová Z. 2020 Perfect date—the review of current research into  
4  
5 1248 molecular bases of mammalian fertilization. *J. Assist. Reprod. Genet.* **37**, 243–256.  
6  
7  
8 1249 (doi:10.1007/s10815-019-01679-4)  
9  
10 1250 169. Damaziak K, Kieliszek M, Buław M. 2020 Characterization of structure and protein  
11  
12 1251 of vitelline membranes of precocial (ring-necked pheasant, gray partridge) and  
13  
14 1252 superaltricial (cockatiel parrot, domestic pigeon) birds. *PLoS One* **15**, 1–24.  
15  
16  
17 1253 (doi:10.1371/journal.pone.0228310)  
18  
19 1254 170. Hurley LL, Fanson K V., Griffith SC. 2017 Variation in the number of sperm trapped  
20  
21 1255 on the perivitelline layer of the egg in three species of estrildid finch. *AUK* **134**, 832–  
22  
23 1256 841. (doi:10.1642/AUK-17-41.1)  
24  
25  
26 1257 171. Hemmings N, Birkhead TR. 2015 Polyspermy in birds: sperm numbers and embryo  
27  
28 1258 survival. *Proc. R. Soc. B-BIOLOGICAL Sci.* **282**. (doi:10.1098/rspb.2015.1682)  
29  
30  
31 1259 172. Stepieńska U, Olszańska B. 2003 DNase I and II present in avian oocytes: a possible  
32  
33 1260 involvement in sperm degradation at polyspermic fertilisation. *Zygote* **11**, 35–42.  
34  
35 1261 (doi:10.1017/S0967199403001059)  
36  
37  
38 1262 173. Damaziak K, Paweska M, Gozdowski D, Niemiec J. 2018 Short periods of incubation,  
39  
40 1263 egg turning during storage and broiler breeder hens age for early development of  
41  
42 1264 embryos, hatching results, chicks quality and juvenile growth. *Poult. Sci.* **97**, 3264–  
43  
44 1265 3276. (doi:10.3382/ps/pey163)  
45  
46  
47 1266 174. Koyanagi F, Nishiyama H. 1981 Fate of spermatozoa that do not participate in  
48  
49 1267 fertilization in the domestic fowl. *Cell Tissue Res.* **214**, 89–95.  
50  
51 1268 (doi:10.1007/bf00235147)  
52  
53  
54 1269 175. Bakst MR, Eastridge J, Malecki IA. 2014 The inner perivitelline layer sperm hole  
55  
56 1270 assay: Use of filter paper rings for the isolation of the perivitelline layer overlying the  
57  
58 1271 germinal disc and new observations on its morphology. *J. Appl. Poult. Res.* **23**, 121–  
59  
60

- 1  
2  
3 1272 128. (doi:10.3382/japr.2013-00873)  
4  
5 1273 176. Wishart GJ. 1987 Regulation of the length of the fertile period in the domestic fowl by  
6  
7 1274 numbers of oviducal spermatozoa, as reflected by those trapped in laid eggs. *J.*  
8  
9 *Reprod. Fertil.* **80**, 493–8. (doi:10.1530/jrf.0.0800493)  
10 1275  
11  
12 1276 177. Barbato GF, Cramer PG, Hammerstedt RH. 1998 A practical in vitro sperm-egg  
13  
14 1277 binding assay that detects subfertile males. *Biol. Reprod.* **58**, 686–699.  
15  
16 1278 (doi:10.1095/biolreprod58.3.686)  
17  
18  
19 1279 178. Firman RC. 2018 Postmating sexual conflict and female control over fertilization  
20  
21 1280 during gamete interaction. *Ann. N. Y. Acad. Sci.* **1422**, 48–64.  
22  
23 1281 (doi:10.1111/nyas.13635)  
24  
25  
26 1282 179. Berlin S, Qu L, Ellegren H. 2008 Adaptive evolution of gamete-recognition proteins in  
27  
28 1283 birds. *J. Mol. Evol.* **67**, 488–496. (doi:10.1007/s00239-008-9165-6)  
29  
30 1284 180. Liu W *et al.* 2017 Dosage effects of ZP2 and ZP3 heterozygous mutations cause  
31  
32 1285 human infertility. *Hum. Genet.* **136**, 975–985. (doi:10.1007/s00439-017-1822-7)  
33  
34  
35  
36 1286  
37  
38  
39  
40  
41  
42  
43  
44  
45  
46  
47  
48  
49  
50  
51  
52  
53  
54  
55  
56  
57  
58  
59  
60

## Appendix B

We thank the editor and reviewers for their time and efforts spent reviewing our manuscript, and we thoroughly appreciate the comments and suggestions that have been provided. The reviewers offered us much food for thought, and we have extensively revised the manuscript based on their suggestions. We feel that the review is much improved as a consequence of this process. The changes we have made are detailed on a point-by-point basis, with each reviewer comment followed by our response in bold type. We also provide a version of the manuscript with all the changes highlighted to facilitate further review, and a clean version with all changes made but not highlighted. We hope you now consider our manuscript suitable for publication in Open Science.

### Response to reviewer 1

#### Reviewer comment:

I would not consider this to be a comprehensive review. But based on the objectives listed at the beginning of the paper, I am not sure it is meant to be. There are several other papers on the topic in poultry in particular that are not included in this review.

#### **Author reply:**

**We would like to thank Reviewer 1 for taking the time to read and comment on our paper – many of the suggestions made have been very useful, and have facilitated changes which we feel have significantly improved the manuscript. With respect to the reviewer’s point about the comprehensiveness of the review: our intention for this review was to integrate the most valuable and key insights from a broad range of fields. In this way we hope this review taps into a broader readership, encouraging greater cross-utility between different fields such as behavioural ecology, evolutionary biology, conservation science etc. We have therefore not been able to cite every relevant fertility paper across all these fields, however we do believe the review to be extensive and thorough, covering the most important aspects of female physiological function and fertility. To ensure our intentions for the review are not misunderstood, we have added a clarification to the introduction which describes its aims and scopes (lines 66-69). We have also included a number of extra citations in the text, including those that you have suggested. We would also like to mention that the quantitative analysis section was comprehensive, including every relevant fertility paper from a systematic Web of Science search, and these papers can all be found in the supplementary data provided.**

#### Reviewer comment:

In the sperm:egg interaction section of the review, I know of several papers that are not cited. There is at least one theory of thought that I did not think was included and that is the interaction of the yolk with the IPVL in the non-germinal disc areas of the egg. I provided the authors some of those references but it has been a while since I have reviewed the literature on that topic and I would not consider this to be a comprehensive list.

#### **Author reply:**

**Thank you for pointing this out, we have now included this in lines 633-639.**

#### Reviewer comment:



Line 35 – 37: This is not an objective or definitive statement. Surely a review of the literature such as the current manuscript would be able to more better define the differences in male and female work. While one paper may state this, it does not necessarily make it true.

**Author reply:**

**We have added additional lines here (lines 32-35) to further support the hypothesis that females have received less attention in avian fertility research. The intention for this line is to introduce the hypothesis that female fertility has been understudied, setting up the reader for the quantitative analysis which later provides evidence to support this.**

Reviewer comment:

Line 54 – 56: Reproductive traits are only focused on in either the breeds used for table egg production or in some of the female broiler and turkey lines. Otherwise, the selection focus is on economically important traits (weight, weight gain, feed conversion, etc.) which are often inversely correlated with reproductive efficiency.

**Author reply:**

**While it is certainly true that not all lines are selected for egg production traits, the focus of this point was to draw attention to the pervasive issues associated with egg production even in the layer lines where egg production has been specifically selected for. We later make the point that in some lines, economically important traits have been selected for at the expense of fertility (see lines 430 and 684). However, we have also altered this sentence (now line 53 and 55) to include the caveat that selection for efficient egg production has only been focussed on in certain lines.**

Reviewer comment:

Line 83 – 84: The wording here makes it sound like scientists are ignoring the female fertility research but in reality it is more likely that male and male management factors are more significant factors that with correction influences the number of fertilized eggs more. Suggest rewriting this this sentence

**Author reply:**

**We have included here some additional evidence that the pattern of a greater focus on male fertility is consistent across both wild populations, and captive populations – even when excluding the domestic chicken (which makes up over half of all the captive studies). This suggests that even beyond the studies made in poultry, male fertility is still focussed on more heavily. We have, however, altered this sentence here to avoid using the term 'bias' as per your suggestion, rewording it to the following: “there is a deficit of papers focusing on females (compared with males) within avian fertility research” on lines 86-87. We have also included a further statement about the practical advantages of studying male fertility traits for commercial species (lines 106 – 110), and reworded other lines of the review in keeping with the change in terminology.**

Reviewer comment:

Line 92 – 93: Again, is bias the correct word to use here? More efforts on captive populations are probably overwhelmed by those studies that are carried out with poultry.

**Author reply:**

**As above, we have altered the wording used here. We ensure that the new wording we have applied is consistent throughout the review when referring to this point.**

Reviewer comment:

Line 100 – 108: While these points may be factors in the number of male to female fertility studies, it may just be the case, especially in poultry, that males mate with up to 10-15 females. So that management of the male with regards to fertility would affect the number of fertilised eggs more while having a larger economic impact.

**Author reply:**

**It is definitely true that there are several practical advantages to studying sperm relative to ova, and we have further highlighted this within the text. However, the result we have found stands even when we remove domestic fowl (which make up half of all captive studies and is likely to be the main driver of any effects linked to commercial/economic impact) from our dataset. We have now included some additional evidence showing that even when removing domestic fowl, there are over twice as many papers focussed on males than on females. We also see this pattern mirrored in wild populations. We think this was an important point to raise. It suggests that even beyond any economic advantages to studying males for poultry science, this pattern is consistent across the entire field (see lines 100-104). That said, we do agree though that the historic economic and practical benefits for studying males in poultry has probably driven greater research, and this has likely contributed to the greater number of papers on males outside of poultry research as well, since we expect such advances to generate positive feedback in research effort. We had already made this point within the text, but have highlighted it further on lines 110-112.**

Reviewer comment:

Line 140: Does the follicle or egg rupture?

**Author reply:**

**It is the follicle that ruptures at the stigma region, releasing the ovum. To ensure this is clear we have adjusted the wording of this line (now line 160 – 162).**

Reviewer comment:

Line 432 - 434: Bird size due to obesity as an impediment to successful mating?

**Author reply:**

**Yes, thank you for pointing this out. This is now included (now line 450).**

Reviewer comment:

Line 621: Another theory on the mechanism of preferential binding of sperm in the germinal disc region involved the discontinuous nature of the oolema which allow yolk to contact those areas of the IPVL. As a result of this, structural blocks from the yolk/IPVL interaction may prevent sperm from attaching. Bakst and Howarth 1977a; Robertson 1999. Also see Fertilization in Birds, 2000 Wishart and Horrocks in Fertilization in Protozoa and Metazoan Animals

**Author reply:**

**Thank you, we have included a short statement regarding this hypothesis on line 633-639, including your suggested references in addition to some others.**

Reviewer comment:

Line 701: How would it benefit? Up until this section the review has been backed by research studies. In these few sentences more opinion than fact are offered.

**Author reply:**

The previous sentence draws attention to our finding that far fewer studies have investigated fertility in non-poultry / wild species, which our earlier quantitative analysis finds evidence for. The intention here is to highlight that further studies in wild populations will rebalance our knowledge. But to highlight further the benefits to studying wild populations we have added an additional statement to expand on this (line 789 - 792)

**Response to reviewer 2****Reviewer comment:**

I have not followed the avian ovarian physiology literature in several years, but I am knowledgeable in the area of reproductive ecology and behavior. So, I feel I should be able to provide some insight from that perspective. My overall impression of this manuscript is very favorable. It is an important topic, and the authors are correct that fertility problems have been poorly defined historically and that female fertility is a vastly understudied area. The authors seem to cover the topic thoroughly, so it is my opinion that this manuscript would make an important and much-needed contribution to the field. With all that said, however, I am not convinced that Royal Society Open Science is the best venue for its publication, given the journal's own account of favoring papers that are of very broad, general interest. Indeed, I am not sure how broad and general the interest in physiological mechanisms of female bird fertility is. If the paper were on mechanisms of vertebrate or perhaps mammalian fertility, it might be of broader interest. But its current focus on female birds would seem to lend itself better to a bird journal, perhaps, or a journal more specifically oriented toward reproductive physiology, such as *Biology of Reproduction*.

**Author reply:**

We would like to thank Reviewer 2 for the time taken to review our manuscript, and their positive comments and support of the need for this work. The suggestions made by Reviewer 2 have facilitated productive discussion, and the changes we have made as a consequence have significantly improved the paper. While we appreciate that historically, mammalian fertility is considered to be of more general interest, birds are one of the most intensely studied taxa in terms of reproduction and fertility. Birds are also far more diverse and more populous than mammals, and are incredibly popular study organisms within a variety of scientific fields. Furthermore, we believe that this review encourages greater integration between disciplines, bringing together an extensive range of literature that will interest a broad readership. Insights from birds – an important model species for fertility – will be of great value across taxa and we think it would be a shame to limit its readership to ornithologists alone. Royal Society Open Science specifically encourages reviews that generate new avenues for future work, which we have provided extensively throughout the review, as well as providing constructive critiques of fields, which we also focus on heavily. Consequently, we believe that Royal Society Open Science is the perfect home for this review.

**Reviewer comment:**

As I indicated, however, I do feel that it is a worthwhile contribution, but some changes, as follows, would make it better. First, it is difficult to understand its overall organization. I

wonder if a table of contents would be appropriate. I found it difficult to understand how each section tied in with the one before it and the one after it and then how they all fit together to address the central question: what causes infertility in female birds? One possibility would be to organize the paper around the anatomy of figure 2, walking the reader through each part of egg formation and how fertility can be affected in that part. Additionally, somewhere around line 41, it would be extremely helpful to list as many mechanisms for failed syngamy as possible in order to set up the rest of the paper. The paper could then be better organized around these. Currently, it seems vaguely organized around aspects of Figure 2, but a more deliberate breakdown of the specific ways syngamy can fail, perhaps in order of timing, would greatly facilitate the organization of the paper and therefore understanding it. Currently the paper reads like a long list of what we know about reproduction with little direct tie-in to failed syngamy, especially in any sort of chronological or other logical order.

**Author reply:**

**This is an excellent suggestion. We have consequently restructured the review to pull focus back onto the specific mechanisms of female infertility in birds. As you suggested, we have organised the paper to follow roughly the anatomy of Figure 2. The introduction and systematic analysis of the literature sections have remained as they were, but section III is now restructured with the title of this section and the title of the subheadings pulling more focus onto the mechanisms of fertilisation failure. We feel this has much improved the entire manuscript, with the organisation having a more succinct and understandable flow. We also were able to provide a broad list of the mechanisms of infertility within the introduction (line 72 – 74), as you suggested, and this sets the reader up nicely for the rest of the review since this list now mirrors the overall structure of section III. We also found that by restructuring the review we have naturally incorporated many of your other suggestions and comments. We decided not to include a contents table given that this does not seem fitting with the general style of Royal Society Open Science, but have provided a table of the new structure for section III below for your information:**

**III. What causes fertilisation failure in female birds?**

- 1 Failure during egg formation**
  - 1.1 Hormonal factors**
  - 1.2 Disease and immune factors**
  - 1.3 Environmental factors**
    - 1.3.1 Diet**
    - 1.3.2 Stress**
    - 1.3.3 Pollution**
- 2 Failure during ovulation**
  - 2.1 Hormonal factors**
  - 2.2 Disease and immune factors**
- 3 Failure to obtain sperm**
  - 3.1 Copulation**
  - 3.2 Timing of insemination**
  - 3.3 Vaginal sperm selection**
- 4 Failure to maintain and transport sperm**
  - 4.1 Sperm storage tubule function**
  - 4.2 Sperm release and transport**

## 5 Failure of sperm-egg fusion

### 5.1 Sperm-egg interactions

### 5.2 Syngamy

#### Reviewer comment:

I think about fertility from an adaptive perspective. Given the presence of a multitude of life-history trade-offs (particularly the trade-offs between number of offspring and quality of offspring within a single brood and also the trade-off between number of current offspring and number of future offspring), perhaps the term "failure" is inappropriate when describing when fertilization does not occur. There may be times when it benefits the female from a fitness perspective to avoid fertilization, even if it means the wasted time and energy that went into production of an infertile ovum or egg. Given that, at least in wild, altricial birds, far more investment occurs in feeding young than in forming the egg for the young, a female suddenly faced with an unexpected challenge (such as unexpected energy demands, predatory risks, or poor quality mate) might benefit by selectively blocking fertilization to avoid costly stages later during nestling rearing when conditions might not merit the investment. For example, the female may be constrained to laying 4 eggs, but challenging food conditions might mean that, this particular bout, 3 eggs might be more adaptive, so she can at least raise 3 good offspring rather than 4 poor ones. In this case, one way to save energy would be to adaptively prevent fertilization of one of the ova, giving rise to 4 eggs but only 3 mouths to feed. Ultimately, I think use of the terms "fail" and "succeed" when it comes to syngamy or fertilization is loaded and assumes fertilization is always adaptive, when there might be situations in which it is not adaptive.

#### **Author reply:**

**This is an interesting point, however we believe that it goes somewhat beyond the scope of the current review to consider the adaptive potential of infertility. Here, we are solely concerned with physiological fertility problems encountered by female birds, making the term fertilisation 'failure' appropriate in this case. Furthermore, the potential for infertility to be adaptive is currently rather speculative, with (to our knowledge) no current research indicating that infertility itself could be advantageous, and no known mechanisms by which it could occur. We believe there is a strong argument that selective embryo mortality (i.e. rejection of the egg after laying) could be adaptive, and indeed this does occur in some species with some females choosing not to incubate certain eggs/clutches. However, we do not believe a block to fertilisation is likely to be either physiological feasible or adaptive. That is because, once ovulation has occurred, the female has no choice but to lay the resulting egg. A mechanical mechanism to block fertilisation of an ovum would therefore not ameliorate any costs of reproduction and so be unlikely to evolve. Theoretically, if a female could selectively fail to produce an egg in the first place, this could be adaptive since it avoids the initial heavy cost of egg production and laying. However, in many species, females lay eggs even when they do not have access to sperm, suggesting that control over egg production itself is limited. A final theoretical mechanism would be to avoid copulation itself, although this would not be possible for species where forced copulations are common. Females could alternatively physically reject sperm before it reaches the site of fertilisation, though this would not be adaptive for species that lay eggs even without the presence of sperm, and would not ameliorate the costs associated with copulation either. Given that, we do not believe**

**there is currently a strong argument for infertility to be adaptive, and so for the purposes of this review, we believe that the term fertilisation 'failure' is acceptable.**

Reviewer comment:

Lines 408-410: Up to this point, the manuscript has mainly focused on what we know in domestic species, each time referring to how little is known in wild species. The reader is left wondering what is known for wild species. So far, the manuscript mostly reads as a review in domestic species despite what seemed to be a focus early on on the importance of this topic to wild species.

**Author reply:**

**We agree that it is surprising and somewhat frustrating that such little knowledge exists for wild populations. Indeed, it is partly our intention to highlight this within the review. We have included the most relevant and key insights gained from wild species, which admittedly is dwarfed by what is known in domestic birds. We agree however, that the inclusion of this information was not well balanced throughout the review under the previous structure. As per your recommendation, we have restructured the review, and one of our goals here was also to better highlight the findings for wild species within this new structure. Since the majority of research into fertility in wild species has focussed on the influence of environmental factors (such as heat stress/ climate change and pollution), we have drawn better attention to this by creating a separate 'environmental factors' subheading early in the review. We would also like to draw your attention to the analysis where we have further highlighted that there is a deficit of fertility papers on wild populations, and we also return to this point within the conclusions and future directions section.**

Reviewer comment:

Lines 686-687: It is this possibility specifically that I think of above all else when it comes to possible ways for fertilization to fail, and yet apparently nothing is known. Nonetheless, if the authors could go into greater detail, even if just speculation, I think it would resolve a lot of wondering by their readers.

**Author reply:**

**We agree that it is somewhat surprising that so little is known about how ovum quality influences fertility in birds. To address your suggestion, we have included some more speculation as to the influence of ovum quality on fertility, specifically drawing more parallels with what is known in mammals, and suggesting similar mechanisms could occur in birds. We believe this section is now much improved due to this inclusion.**

Reviewer comment:

In several places throughout the manuscript, the authors mention effects of aging on female fertility and mechanisms surrounding it. Although aging is relevant to an extent, it is unlikely to be particularly relevant in wild birds that never get very old. In fact, most wild birds may experience age-related increases in reproductive function during their short lives, and this may be due, in part, to priming by photostimulation (Sockman, K.W., Williams, T.D., Dawson, A., & Ball, G.F. (2004). Prior experience with photostimulation enhances photo-induced reproductive development in female European starlings: a possible basis for the age-related increase in avian reproductive performance. *Biology of Reproduction* 71, 979-

986.)

**Author reply:**

**Thank you, yes this is an interesting point. While we do see an initial increase in reproductive success in some seasonally reproducing birds, the general and gradual decline in fertility with age is common across species. It is usually observed in birds as an increase in the length of inter-clutch intervals, smaller clutch sizes and a general increase in the number of failed reproductive attempts (Ellison & Ottinger, 2014). You are right in that this is primarily of concern to captive populations of both commercial and non-commercial birds which do tend to live longer than many wild species and also be pushed to be reproductively active for longer too. However, ageing in wild species has been shown to also be widespread across birds and mammals (e.g. Nussey et al., 2013; Robery et al., 2015), and it is also a very important consideration for some endangered species, (such as the whooping crane (Brown et al., 2019)) and for managed wild populations where management interventions (such as supplemental feeding) influences patterns of ageing. We have consequently included a short discussion here (line 340 -353), emphasising that fertility can initially increase with photo-experience. We have included your references here as well as the notable example of fertility senescence in whooping cranes, and the contradictory example of long-lived seabirds who experience apparently no reproductive decline throughout their lives.**

Reviewer comment:

Lines 28-29: Delete.

**Author reply:**

**Thank you, we have deleted this line.**

Reviewer comment:

Line 40: Is this the most broadly used and accepted definition of infertility? If not, reword to say something like "We define infertility as . . . "

**Author reply:**

**Thank you, we have corrected this.**

Reviewer comment:

Line 87: It may be more technically difficult to study and understand female compared to male fertility.

**Author reply:**

**We have further highlighted the technical and practical advantages to studying male fertility vs female fertility (lines 106-110).**

Reviewer comment:

Lines 133-136: Out of curiosity, how is the left but not right protected?

**Author reply:**

**This is a really interesting question which unfortunately doesn't appear to have a clear answer. Briefly - both the left and the right ovary begin developing together but then asymmetric development is observed after around 6 days of incubation. Development of the left ovary is promoted by asymmetrical gene expression and migration of primordial germ cells into the left gonad during embryogenesis. Expression of pituitary homeobox 2 (*PITX2*) within the left ovary suppresses oestrogen receptors in the right ovary, resulting in**

elevated concentrations of oestrogen in the left ovary relative to the right. The anti-Müllerian hormone (AMH) (the expression of which is regulated by the transcription factor SF1) is then thought to initiate apoptosis of the right Müllerian duct, causing it to regress. As briefly mentioned in the manuscript, it is widely thought that the elevated concentrations of oestrogen in the left ovary suppress the anti-Müllerian hormone receptor, and this prevents the left ovary from regressing. Unfortunately, the molecular mechanisms underpinning this have not been fully defined, and while many papers do find evidence for apoptosis in the right ovary (e.g. Ukeshima 1996, Grzegozewska 2012, Shaikat et al., 2018 etc), there is at least one case where apoptosis was not evident (De Melo Bernardo et al., 2015). We believe including full details of the molecular mechanisms governing this process goes beyond the scope of this paper, however we have added a clarification here that this is still an area of active research.

Reviewer comment:

The paper's figures are beautifully made. Textbook quality.

**Author reply:**

**Thank you for this comment!**

Reviewer comment:

Lines 192-193: Although not directly tied to the topic of fertility, it might be worth mentioning the role this is thought to play in yolk steroid deposition (Schwabl, H. (1993). Yolk is a source of maternal testosterone for developing birds. *Proceedings of the National Academy of Sciences USA* 90, 11446-11450; Groothuis, T.G.G., Müller, W., Von Engelhardt, N., Carere, C., & Eising, C. (2005). Maternal hormones as a tool to adjust offspring phenotype in avian species. *Neuroscience and Biobehavioral Reviews* 29, 329-352).

**Author reply:**

**Thank you for bringing this up, and it is certainly an interesting phenomenon, however here we primarily discuss the influence of gonadal steroids only as it pertains to maternal fertility (in this case ovulation), not of how maternal hormones later go on to influence embryo development. We have tried to steer away from a discussion of embryo development as much as possible given how common it is for researchers to confuse infertility and embryo mortality with each other. We believe a discussion of this might muddy the waters in terms of fertility, so have chosen to leave this out.**

Reviewer comment:

Line 220: But see: Arlt, D., Bensch, S., Hansson, B., Hasselquist, D., & Westerdahl, H. (2004). Observation of a ZZW female in a natural population: implications for avian sex determination. *Proceedings of the Royal Society of London B Biological Sciences* 271, S249-S251. doi:10.1098/rsbl.2003.0155

**Author reply:**

**Thank you, we have now included this reference (now line 718)**

Reviewer comment:

Lines 457-458: Increased relative to what? To a time more distant from ovulation?

**Author reply:**

**We have reworded and improved the clarity of this section which is now on lines 479 – 484.**



## **Appendix C**

**We are thrilled at the editor's decision to accept our manuscript for publication. We would like to thank the editors for their time and efforts spent attempting to obtain a second reviewer to assess the changes we have made. We appreciate the decision to move forward based on the feedback from reviewer 1, and further thank reviewer 1 for the time taken to review our manuscript for a second time. We have addressed the additional suggestion made by reviewer 1 below and have attached both a clean and marked up version of the manuscript with the changes highlighted. Thank you again for accepting our paper for publication in Open Science.**

**Kind regards,**

**Katherine Assersohn, Patricia Brekke and Nicola Hemmings**

### **Response to reviewer 1**

#### **Reviewer comment:**

Personally I think your revisions have improved the paper greatly. I only have one minor suggestion before publishing. In every other case in the paper where the term "for example" was used, you provided an example. In one case you did not. See the Line 445 comment below.

Line 445 – This is a personal preference, but I do think it helps the readers if when the text says "although there are a few examples...", especially those new to the area, make the information more useful to them, that some specific examples, maybe in parentheses are provided.

#### **Author reply:**

**We agree the paper is much improved and this is largely thanks to your helpful feedback, which we are extremely grateful for. Thank you for the additional comment, we agree and have addressed this in the manuscript by adding several examples in parentheses as you suggest, and we have included two additional references.**
